1 **Cell-type specific circadian bioluminescence rhythms in *Dbp* reporter mice**

2

3 **Short Running Title:** Bioluminescence Rhythms in *Dbp* reporter mice

4

5 <sup>a,b,1,2</sup>Ciearra B. Smith, <sup>a,c,1</sup>Vincent van der Vinne, <sup>d</sup>Eleanor McCartney, <sup>e</sup>Adam C. Stowie, <sup>f</sup>Tanya L.  
6 Leise, <sup>d,3</sup>Blanca Martin-Burgos, <sup>d</sup>Penny C. Molyneux, <sup>g</sup>Lauren A. Garbutt, <sup>h</sup>Michael H. Brodsky, <sup>e</sup>Alec  
7 J. Davidson, <sup>d</sup>Mary E. Harrington, <sup>g</sup>Robert Dallmann, and <sup>a,b,i,4</sup>David R. Weaver

8

9 <sup>a</sup> Department of Neurobiology, University of Massachusetts Chan Medical School, Worcester MA

10 <sup>b</sup> Graduate Program in Neuroscience, University of Massachusetts Chan Medical School, Worcester MA

11 <sup>c</sup> Department of Biology, Williams College, Williamstown, MA

12 <sup>d</sup> Neuroscience Program, Smith College, Northampton MA

13 <sup>e</sup> Neuroscience Institute, Morehouse School of Medicine, Atlanta GA

14 <sup>f</sup> Department of Mathematics and Statistics, Amherst College, Amherst MA

15 <sup>g</sup> Division of Biomedical Sciences, Warwick Medical School, University of Warwick, Coventry, UK

16 <sup>h</sup> Department of Molecular, Cell and Cancer Biology, University of Massachusetts Chan Medical  
17 School, Worcester MA

18 <sup>i</sup> NeuroNexus Institute, University of Massachusetts Chan Medical School, Worcester MA

19

20 <sup>1</sup> C.B.S and V.v.d.V. contributed equally to this work.

21 <sup>2</sup> Present address: American Society for Biochemistry and Molecular Biology, Rockville MD 20852

22 <sup>3</sup> Present address: University of California, San Diego, La Jolla, CA USA

23 <sup>4</sup> To whom correspondence may be addressed:

24 Email: [David.weaver@umassmed.edu](mailto:David.weaver@umassmed.edu)

25 David R. Weaver, Ph.D., Department of Neurobiology, LRB-723, UMass Chan Medical School, 364

26 Plantation St., Worcester MA 01605

27 **Keywords:** Circadian Rhythms, Bioluminescence, Luciferase, Misalignment, *Dbp*, Albumin D-element  
28 binding protein, *In Vivo* Imaging System (IVIS), LumiCycle *In Vivo*, Reporter Mouse, Peripheral  
29 Oscillators

30 **Conflict of interest statement:** The authors declare no conflicts of interest.

31 **Abstract**

32 Circadian rhythms are endogenously generated physiological and molecular rhythms with a cycle length  
33 of about 24 h. Bioluminescent reporters have been exceptionally useful for studying circadian rhythms in  
34 numerous species. Here, we report development of a reporter mouse generated by modification of a  
35 widely expressed and highly rhythmic gene encoding D-site albumin promoter binding protein (*Dbp*). In  
36 this line of mice, firefly luciferase is expressed from the *Dbp* locus in a *Cre*-recombinase-dependent  
37 manner, allowing assessment of bioluminescence rhythms in specific cellular populations. A mouse line  
38 in which luciferase expression was *Cre*-independent was also generated. The *Dbp* reporter alleles do not  
39 alter *Dbp* gene expression rhythms in liver or circadian locomotor activity rhythms. *In vivo* and *ex vivo*  
40 studies show the utility of the reporter alleles for monitoring rhythmicity. Our studies reveal cell-type  
41 specific characteristics of rhythms among neuronal populations within the suprachiasmatic nuclei *ex vivo*.  
42 *In vivo* studies show *Dbp*-driven bioluminescence rhythms in the liver of *Albumin-Cre;Dbp<sup>KL/+</sup>* “liver  
43 reporter” mice. After a shift of the lighting schedule, locomotor activity achieved the proper phase  
44 relationship with the new lighting cycle more rapidly than hepatic bioluminescence did. As previously  
45 shown, restricting food access to the daytime altered the phase of hepatic rhythmicity. Our model allowed  
46 assessment of the rate of recovery from misalignment once animals were provided with food *ad libitum*.  
47 These studies confirm the previously demonstrated circadian misalignment following environmental  
48 perturbations and reveal the utility of this model for minimally invasive, longitudinal monitoring of  
49 rhythmicity from specific mouse tissues.

50

## 51 **Introduction**

52 Circadian rhythms are endogenous rhythms with a cycle length of ~24 hours. The mammalian  
53 circadian system is hierarchical, with the hypothalamic suprachiasmatic nuclei (SCN) serving as the  
54 pacemaker (Mohawk et al., 2012; Herzog et al., 2017). The SCN are synchronized by environmental cues,  
55 of which the light-dark cycle is the most influential. The SCN are not unique in their capacity for  
56 rhythmicity, however. The transcriptional-translational feedback loop regulating molecular oscillations in  
57 the SCN is also present in individual cells throughout the body (Mohawk et al., 2012). SCN-driven  
58 neural, behavioral and hormonal rhythms synchronize these cell-autonomous oscillators, leading to  
59 rhythmicity with predictable phase relationships among tissues, genes and physiological processes  
60 (Mohawk et al., 2012; Patke et al., 2020; Zhang et al., 2014). Repeated disruption of this internal temporal  
61 order by inappropriately timed light exposure or food intake leads to adverse health consequences in shift-  
62 working humans and in animal models (Evans & Davidson, 2013; Patke et al., 2020). Progress in  
63 identifying the mechanisms by which chronic circadian disruption leads to adverse health consequences  
64 will require long-term monitoring of central and peripheral rhythms (Roenneberg & Mellow, 2016).

65 Rhythmically expressed reporter genes have been extremely important for demonstrating cell-  
66 autonomous circadian clocks and monitoring rhythmicity in several organisms, including plants (Millar et  
67 al., 1992), *Neurospora* (Morgan et al., 2003), cyanobacteria (Kondo et al., 1993), *Drosophila* (Brandes et  
68 al., 1996), zebrafish (Weger et al., 2013), cultured cells (Nagoshi et al., 2004; Hirota et al., 2010; Welsh et  
69 al., 2004; Zhang et al., 2009), rodent tissue explants (Abe et al., 2002; Maywood et al., 2013; Yamazaki et  
70 al., 2000; Yoo et al., 2004; Yoo et al., 2005), and rodent tissues *in vivo* (Saini et al., 2013; Tahara et al.,  
71 2012). Circadian reporter genes have been instrumental in screens to identify clock genes and modifiers in  
72 many of these systems (Cesbron et al., 2013; Chen et al., 2012; Hirota et al., 2010; Kondo et al., 1993;  
73 Millar et al., 1995; Muñoz-Guzmán et al., 2021; Stanewsky et al., 1998; Zhang et al., 2009). Circadian  
74 reporters have also been used to assess rhythmicity in peripheral tissues and the impact of alterations in  
75 experimental or environmental conditions (food availability, lighting cycles, glucocorticoid treatment) on  
76 peripheral oscillators, conducted by measuring bioluminescence rhythms in tissue explants monitored *ex*

77 *vivo* (Davidson et al., 2008; Davidson et al., 2009; Nakamura et al., 2005; Pezuk et al., 2012; Sellix et al.,  
78 2012; Stokkan et al., 2001; Yamanaka et al., 2008; Yamazaki et al., 2000). These studies complement  
79 work done by assessing population rhythms in gene expression in tissue samples indicating altered  
80 rhythm amplitude and phase, and altered phase relationships in and between SCN and peripheral  
81 oscillators following resetting (Balsalobre et al., 2000; Damiola et al., 2000; Destici et al., 2013; Nagano  
82 et al., 2003; Reddy et al., 2002; Yamaguchi et al., 2013; for review see Nicholls et al., 2019). Several  
83 groups have developed methods for *in vivo* assessment of reporter gene activity from brain regions,  
84 including the SCN, using implanted optical fibers and freely moving (but tethered) rodents (Hamada et  
85 al., 2016; Mei et al., 2018; Nakamura et al., 2008; Ono et al., 2015; Yamaguchi et al., 2001; Yamaguchi  
86 et al., 2016). Other studies have localized the source of bioluminescence from widely expressed reporter  
87 genes in specific peripheral tissues based on photomultiplier tube placement on the body surface (Hamada  
88 et al., 2016; Sawai et al., 2019). Peripheral organ reporter gene activity has been assessed by *in vivo*  
89 imaging in anesthetized mice (Saini et al., 2013; Tahara et al., 2012) and more recently in ambulatory  
90 mice (Martin-Burgos et al., 2020; Saini et al., 2013; Sinturel et al., 2021). In some cases, viral vectors  
91 that afford anatomical specificity (through their site of injection, tropism and/or by their design) have  
92 been used to direct reporter expression to specific tissues (Mei et al., 2018; Saini et al., 2013; Sinturel et  
93 al., 2021). All of these approaches are hampered by the need to develop specific reagents or approaches  
94 for each tissue being examined, and many of these approaches are invasive. In view of the large number  
95 of mouse lines with tissue-specific expression of *Cre* recombinase, the field would benefit considerably  
96 from a binary (*Cre-lox*) reporter system in which bioluminescence from a rhythmically expressed gene  
97 can be switched on in tissues expressing *Cre* recombinase, simply by crossing mice of the appropriate  
98 genotypes together.

99 Here, we report a new transgenic mouse line in which firefly luciferase is expressed from the  
100 mouse *Dbp* locus in a *Cre*-recombinase-dependent manner. *Dbp* is widely and rhythmically expressed  
101 (Fonjallaz et al., 1996; Punia et al., 2012; Zhang et al., 2014), allowing detection of circadian  
102 bioluminescence rhythms in numerous tissues, *in vivo* and *ex vivo*. *Cre*-dependent bioluminescence

103 rhythms were recorded *ex vivo* from specific SCN neuronal populations. Furthermore, we observed  
104 transient misalignment between behavioral and hepatic bioluminescence rhythms in freely moving mice  
105 subjected to a shift of the light-dark cycle or following restricted food access.

106 While this work was being prepared for publication, Shan et al. (2020) reported development of a  
107 Color-Switch *Per2* reporter mouse. In this reporter, *Cre* recombinase expression changes the reporter  
108 fused to mPER2 from red to green luciferase.

109

## 110 **Materials and Methods**

111

### 112 **Animals and Housing Conditions**

113 All animal procedures were reviewed and approved by the Institutional Animal Care and Use  
114 Committees of the University of Massachusetts Chan Medical School, Morehouse School of Medicine,  
115 the University of Warwick, and/or Smith College.

116 Unless otherwise noted, animals were maintained in a 12h light: 12h dark (LD) lighting cycle  
117 with access to food (Prolab Isopro RMH3000; LabDiet) and water available *ad libitum*. Zeitgeber Time  
118 (ZT) refers to time relative to the lighting cycle. ZT 0-12h is the light phase and ZT 12-24h is the dark  
119 phase.

120 *Cre* recombinase-expressing lines were crossed to mice bearing the conditional (*Dbp<sup>KI</sup>*) reporter  
121 allele to generate mice expressing luciferase in specific cells or tissues. *Albumin-Cre* (B6.Cg-*Speer6-*  
122 *ps1<sup>Tg(Alb-Cre)21Mgn/J</sup>*; JAX stock number 003574), *Ksp1.3-Cre* (B6.Cg-Tg{*Cdh16-cre*}91Igr/J, JAX  
123 012237), *AVP-IRES2-Cre* (B6.Cg-*Avp<sup>im1.1(Cre)Hze</sup>*/J; JAX 023530), and *NMS-Cre* mice (Tg(Nms-  
124 *iCre*)<sup>20Ywa</sup>, JAX 027205) were obtained from the Jackson Labs (Bar Harbor, ME). These lines direct *Cre*  
125 recombinase expression to hepatocytes (Postic et al., 1999), renal tubules and genito-urinary epithelia  
126 (Shao et al., 2002), neurons expressing arginine vasopressin (AVP; Harris et al., 2014), and neurons  
127 expressing Neuromedin S (NMS; Lee et al., 2015), respectively. A *Prrx1-Cre* female (B6.Cg-Tg(*Prrx1-*

128 Cre<sup>1Cj</sup>/J), JAX 005584; Logan et al., 2002) was used for germline deletion of the conditional allele (see  
129 below).

130 Founder *Per2*<sup>LucSV/+</sup> mice with an in-frame fusion of firefly luciferase to PER2 and an SV40  
131 polyadenylation signal (Welsh et al., 2004; Yoo et al., 2017) were generously provided by Dr. Joseph  
132 Takahashi, University of Texas Southwestern Medical School, Dallas. All *Per2*<sup>LucSV</sup> reporter mice used for  
133 experiments here were heterozygous (e.g., *Per2*<sup>LucSV/+</sup>). For clarity when referring to literature describing  
134 the more widely used *PER2::LUCIFERASE* fusion reporter line in which the endogenous *Per2* 3' UTR is  
135 downstream of the luciferase coding sequence (Yoo et al., 2004), we will refer to this line as *Per2*<sup>Luciferase</sup>.  
136 Mouse lines were maintained by backcrossing to the C57BL/6J (JAX 000664) background.

137 We also generated albino reporter mice by backcrossing to albino C57BL/6J mice with a  
138 mutation in tyrosinase (*tyr/tyr*; B6(Cg)-*Tyr*<sup>c-2J</sup>/J, JAX stock number 00058). Tyrosinase, like *Dbp*, is  
139 located on mouse chromosome 7. Crossing these lines eventually generated a recombinant (*Dbp*<sup>KI/+</sup>;  
140 *tyr/tyr*) in which both mutant alleles were on the same chromatid. Subsequent crossing to albino mice  
141 expressing *Cre* recombinase allowed production of albino reporter mice. Albino *Dbp*<sup>KI/+</sup> mice on the  
142 B6(Cg)-*Tyr*<sup>c-2J</sup>/J background are being deposited in the Jackson Labs repository (Bar Harbor, ME) as  
143 stock number 036997.

144 Note, caution is needed with the *Ksp1.3-Cre* line reported here, as it has a high frequency of  
145 germline recombination (excision of the floxed region of the conditional allele in the germline, leading to  
146 non-conditional luciferase expression) when *Ksp1.3-Cre* is present in the same parent as *Dbp*<sup>KI/+</sup>.  
147 Recombination also frequently occurs when *Ksp1.3-Cre* females are crossed with *Dbp*<sup>KI</sup> males. When  
148 using the *Cre/lox* system, genotyping strategies should be designed to detect all possible alleles. Even  
149 when the *Ksp1.3-Cre; Dbp*<sup>KI/+</sup> genotype is generated without germline excision of GFP, the sex difference  
150 in *Cre* expression leads to markedly different bioluminescence patterns in males and females (see  
151 Results).

152

153 **CRISPR/Cas9 targeting the *Dbp* locus**

154 The mutant allele was generated by CRISPR/Cas9 mediated engineering of the *Dbp* locus. The  
155 targeting construct (**Figure 1**) consisted of a 5' homology arm terminating just 5' of the *Dbp* stop codon  
156 followed by in-frame sequences encoding a T2A linker (to separate DBP protein from the reporter  
157 polypeptides; Kim et al., 2011), loxP, GFP with the bovine growth hormone polyadenylation signal, loxP,  
158 and *Luc2* followed by the 3'-UTR of *Dbp* (3' homology arm). In the presence of CRE recombinase, two  
159 loxP sites oriented in the same direction will recombine, leading to deletion of the sequence between them  
160 (GFP in this case).

161 In the successful set of microinjections, 34 blastocysts were injected with 40 ng/μl guide RNA  
162 MmDBPki\_gR49f, 50 ng/μl *Cas9* mRNA (synthesized from a *Cas9* PCR product using mMessage  
163 mMachine T7 Ultra Kit from Life Technologies) and 20 ng/μl CAS9 protein (IDT). Two putative  
164 founders were identified using a primer pair internal to the construct (primer pair C; **Table S1**).  
165 Additional primer pairs consisting of a primer in flanking DNA (external to the construct) and a primer  
166 within the construct were used to determine whether these animals had the desired targeting event (primer  
167 pairs F and H, which spanned the 5' and 3' ends, respectively). These studies led to identifying one mouse  
168 as having the correct insertion and recognizing that the other putative founders had random insertion of  
169 the construct rather than homologous recombination into the *Dbp* locus; the mouse with random insertion  
170 was not studied further. Genomic DNA from the founder with insertion into the *Dbp* locus was amplified  
171 using a primer pair flanking the entire construct. Sequencing the product confirmed the construct was  
172 inserted properly, *in vivo*. Primer sets used for verification of the proper insertion of the construct are  
173 listed in **Table S1**.

174 The founder carrying the targeted (knock-in or *Dbp*<sup>KI</sup>) allele and its offspring were backcrossed to  
175 C57BL/6J mice (JAX 000664) for three generations before any intercrossing to reduce the chance of a  
176 potential off-target mutations becoming established in the reporter line.

177 To generate mice with germline deletion of GFP (and thus leading to expression of luciferase  
178 throughout the body), a male *Dbp*<sup>KI/+</sup> was bred to a *Prrx1-Cre* female, which we had on hand and which,

179 in our experience, produces germline deletion of floxed alleles at high frequency when CRE is introduced  
180 from the female. Several mice bearing the newly generated *Dbp<sup>Luc</sup>* allele were identified and backcrossed  
181 to C57BL/6J mice, selecting against *Prrx1-Cre*.

182

### 183 **Genotyping**

184 Genotyping was performed by PCR amplification of DNA extracted from ear punches.  
185 Amplification products were separated by agarose gel electrophoresis. Genotyping protocols for *Per2<sup>LucSV</sup>*  
186 and *Cre* recombinase have been published previously and are listed in Table S1 (van der Vinne et al.,  
187 2018; Weaver et al., 2018, respectively). A mixture of four primers (primer set “4A”) capable of detecting  
188 all possible *Dbp* allele combinations was used for colony genotyping; the three possible alleles (*Dbp<sup>KI</sup>*,  
189 *Dbp<sup>Luc</sup>*, *Dbp<sup>+</sup>*) generate amplicons of 399, 490 and 299 bp, respectively with this primer set. Primer set  
190 4A consists of a common forward primer in exon 4 (5'-TGCTGTGCTTTCACGCTACCAGG-3') and  
191 allele-specific reverse primers in GFP (to detect the *Dbp<sup>KI</sup>* allele; 5'-  
192 AGTCGTGCTGCTTCATGTGGTCG-3'), in *Luc2* (to detect the *Dbp<sup>Luc</sup>* allele; 5'-  
193 TCGTTGTAGATGTCGTTAGCTGG-3'), and in the *Dbp* 3' UTR (to detect the unmodified *Dbp* allele;  
194 5'-TTCAGGATTGTGTTGATGGAGGC-3').

195

### 196 **Generation of Digoxigenin (DIG) DNA Probes and Northern Blot Assay.**

197 DIG-labeled DNA probes were generated by PCR in reactions containing 28  $\mu$ M of DIG-labeled  
198 UTP. Primer sets are listed in **Table S1**.

199 Male mice of five genotypes (WT, *Dbp<sup>KI/+</sup>*, *Dbp<sup>KI/KI</sup>*, *Dbp<sup>Luc/+</sup>*, and *Dbp<sup>Luc/Luc</sup>*) were euthanized by  
200 Euthasol injection for collection of liver tissue at 4-h intervals (ZT 2, 6, 10, 14, 18, 22). RNA was isolated  
201 from the liver tissue by Trizol extraction (Ambion). RNA was quantitated by Nanodrop. Five micrograms  
202 per lane were separated by electrophoresis on 1.2% formaldehyde gels. RNA was transferred to nylon



203 membranes and cross-linked by UV exposure. Blots were prehybridized, probed and detected following  
204 the manufacturer's protocol (Roche), bagged and exposed to X-ray film.

205 Film images of the blots were analyzed by determining the optical density of the *Dbp* and *Actin*  
206 bands within each lane and taking the *Dbp/Actin* ratio. The *Dbp/Actin* ratios were converted to  
207 percentage of maximum *Dbp/Actin* for each transcript type within each blot. Due to the difference in band  
208 location of the three *Dbp* alleles, heterozygous animals contributed a set of values for both the wild-type  
209 transcript and the reporter transcript on each blot. Friedman's one-way analysis of variance and Dunn's  
210 test were used for non-parametric assessment of differences between time-points for each transcript.

211

### 212 **Locomotor Activity Rhythms**

213 Male and female mice of five genotypes (WT, *Dbp*<sup>KI/+</sup>, *Dbp*<sup>KI/KI</sup>, *Dbp*<sup>Luc/+</sup>, and *Dbp*<sup>Luc/Luc</sup>) were  
214 transferred to the experimental room and single-housed with a running wheel. Animals had access to food  
215 and water *ad libitum*. Running-wheel activity was monitored and analysed using ClockLab collection  
216 software (Actimetrics). Mice were entrained to a 12-h light/12-h dark cycle for 18 days, then were placed  
217 into constant darkness (dim red light) for 15 days. The free-running period in constant darkness (DD) was  
218 determined for each animal on DD days 4-15 by periodogram analysis (ClockLab).

219

### 220 **Bioluminescence Recordings from Tissue Explants**

221 Tissue explants were prepared late in the afternoon from *Per2*<sup>LucSV/+</sup> and *Dbp*<sup>Luc/+</sup> mice housed on  
222 a 12-h light/12-h dark lighting cycle. Tissues from the two genotypes were studied together in each run.  
223 Mice were deeply anesthetized with Euthasol and decapitated. Tissues were dissected and immediately  
224 placed in ice-cold 1X HBSS (Gibco). Pituitary gland was subdivided into 4 sections (~2mm<sup>3</sup>) with a  
225 scalpel and each piece was cultured separately. Lung explants were placed three per dish. Up to three  
226 replicate dishes were studied per tissue per animal. Explants were placed on sterile 35-mm Millicell  
227 culture plate inserts (Millipore) in a sealed petri dish containing air-buffered bioluminescence medium  
228 (Yamazaki and Takahashi, 2005) plus D-luciferin (100 μM) (Gold Biotechnology) and incubated at 32 °C

229 as previously described (van der Vinne et al., 2018). Bioluminescence in each dish was measured for 1  
230 minute every 15 minutes using a Hamamatsu LM-2400 luminometer.

231 Bioluminescence records were analyzed using Microsoft Excel to determine period and peak  
232 time. The first 12-h were discarded to exclude acute responses to explant preparation. Photon counts were  
233 smoothed to a 3-h running average and baseline subtracted using a 24-h running average. Circadian  
234 period was determined from the average of the period between each peak, trough, upward crossing and  
235 downward crossing between 24 and 88 hr of recording for each record. Peak time was calculated as the  
236 clock time of the first peak in the background-subtracted data and is expressed relative to ZT of the  
237 extrapolated lighting cycle.

238

### 239 **Imaging of Bioluminescence Rhythms *In Vivo***

240 *In vivo* imaging was performed in the UMass Chan Medical School Small Animal Imaging Core  
241 Facility using an *In Vivo* Imaging System (IVIS-100, Caliper, now Perkin Elmer) as previously described  
242 (van der Vinne et al., 2018; van der Vinne et al., 2020). *Alb-Cre*<sup>+</sup>; *Dbp*<sup>KI/+</sup> (liver reporter), *Dbp*<sup>Luc/+</sup>, and  
243 *Per2*<sup>LucSV/+</sup> mice were anesthetized with 2% isoflurane (Zoetis Inc.) and skin covering the liver, kidneys  
244 and submandibular glands was shaved. Mice were injected with D-luciferin (i.p., 100 µl at 7.7 mM, Gold  
245 Biotechnology) and dorsal (9 min post-injection) and ventral (10.5 min post-injection) images were  
246 captured. To assess bioluminescence rhythms, anesthesia, D-luciferin injection and imaging was repeated  
247 at 4- to 8-hour intervals over approximately 30 hours. Similarly, female kidney reporter mice (*Ksp1.3-*  
248 *Cre*; *Dbp*<sup>KI/+</sup>) were imaged in a separate experiment to assess rhythmicity in bioluminescence, with 5  
249 time-points distributed over 48 h. IVIS images were analyzed using Caliper Life Sciences' Living Image  
250 software (version 4.4) within Regions of Interest (ROI) of fixed size.

251 Whole-body reporters (*Dbp*<sup>Luc/+</sup>) and liver reporters (*Alb-Cre*<sup>+</sup>; *Dbp*<sup>KI/+</sup>) were also used to assess  
252 the distribution of bioluminescence by IVIS imaging. Mice were anesthetized with isoflurane, shaved, and  
253 injected with D-luciferin (100 microliters at 7-10 mM, i.p.) at times of peak expression (ZT 11-16).  
254 Images were captured of ventral and dorsal views at 9-12 minutes after injection. Bioluminescent counts

255 within regions of interest (ROIs) were calculated using Living Image software. ROIs identified on the  
256 ventral surface were the whole rectangular region containing the mouse, and sub-ROI's were a region in  
257 the throat (submandibular gland), upper abdomen, and lower abdomen. Dorsal ROI's were the rectangle  
258 containing the entire mouse and a sub-ROI over the lower back, corresponding to the abdomen on the  
259 dorsal side. Subsequent calculations were performed in Microsoft Excel.

260 Liver and kidney reporter mice were anesthetized, dissected and imaged to confirm that  
261 bioluminescence originated exclusively from the liver. In additional animals, animals were euthanized  
262 before image collection.

263

#### 264 **Bioluminescence Imaging of SCN Explants**

265 Coronal sections containing SCN from adult *NMS-Cre;Dbp<sup>KI/+</sup>*, *AVP-IRES-CRE;Dbp<sup>KI/+</sup>*, and  
266 *Dbp<sup>Luc/+</sup>* mice were dissected, cultured, and imaged as previously described (Evans et al., 2011; Evans et  
267 al., 2013). Briefly, sections containing SCN (150  $\mu$ m) were cultured on a Millicell membrane in air-  
268 buffered media containing 100  $\mu$ M D-luciferin (Gold Biotechnology) and imaged for 5 days using a  
269 Stanford Photonics XR/MEGA-10Z cooled intensified charge-coupled device camera.

270 Rhythmic parameters of luciferase expression were calculated for each slice and for cell-like  
271 regions of interest (ROIs) within each slice using computational analyses in MATLAB (R2018a,  
272 MathWorks) as described previously (Evans et al., 2013; Leise & Harrington, 2011). Briefly, to locate  
273 and extract data from cell-like ROIs, we employed an iterative process identifying clusters of at least 20  
274 bright pixels after background and local noise subtraction (through application of a 2D wavelet transform  
275 using Wavelab 850, (<https://statweb.stanford.edu/~wavelab/>) of a slice image summed across 24 h of  
276 bioluminescence. To extract time series for the ROI's, each image in the sequence was smoothed via  
277 convolution with a Gaussian kernel applied to 12x12-pixel regions and reduced from 512x640 resolution  
278 to 256x320. A discrete wavelet transform (DWT) was applied to each time series to remove the trend and  
279 to extract the circadian and noise components using the *wmtsa* toolbox for MATLAB  
280 (<https://atmos.uw.edu/~wmtsa/>). The criteria for circadian rhythmicity in the ROI time series were a peak

281 autocorrelation coefficient of at least 0.2, a circadian component peak-to-peak time between 18 and 30 h,  
282 an amplitude above baseline noise (standard deviation of noise component), and a cross-correlation  
283 coefficient of at least 0.4 with an aligned sine wave over a 48h window. Peaks of the DWT circadian  
284 component were used to estimate peak time of each ROI.

285 Rhythmicity index (RI) is the peak in the autocorrelation of the DWT-detrended time series,  
286 corresponding to a lag between 16 and 36 hrs, as previously described (Leise et al., 2013; Leise, 2017).  
287 The time of peak bioluminescence, rhythmicity index and the scatter of peak times within each slice for  
288 each ROI was assessed on the first day *ex vivo*. Period of rhythmicity in each ROI was determined as the  
289 average peak-to-peak interval in the second and third cycles. These measures were compared between  
290 genotypes by a general linear model, with slice ID included as a random variable to account for multiple  
291 cells being measured on each slice. Where applicable, post-hoc comparisons were performed using  
292 Tukey's HSD pairwise comparisons.

293

#### 294 **Data Collection and Analysis of Bioluminescence Rhythms in Ambulatory Liver Reporter Mice**

295 Bioluminescence was measured in freely moving *Alb-Cre<sup>+</sup>; Dbp<sup>KI/+</sup>* reporter mice with the  
296 “Lumicycle *In Vivo*” system (Actimetrics, Wilmette, IL) using methods as recently described (Martin-  
297 Burgos et al., 2020). Animals were checked daily at varied times using an infrared viewer (Carson  
298 OPMOD DNV 1.0), or goggles (Pulsar Edge Night Vision Goggles PL75095).

299 Each Lumicycle *In Vivo* unit contained two PMTs (Hamamatsu H8259-01), and programmable  
300 LED lights. A programmable shutter blocked the PMTs during periods of light exposure and to measure  
301 ‘dark counts’. Each 1-minute dark-count value was subtracted from the counts recorded during the  
302 subsequent 14 minutes to obtain the background-corrected count values, to compensate for the effect of  
303 temperature fluctuations on PMT signal.

304 Ambulatory bioluminescence data were analyzed using RStudio. A discrete wavelet transform  
305 (DWT) was applied to each time series to detrend and to calculate the time of peaks using the *wmtsa* R  
306 package (<https://cran.r-project.org/web/packages/wmtsa/index.html>), as described (Leise & Harrington,

307 2011; Leise et al., 2013; Leise , 2017). The S12 filter was applied on 15-min median binned data; medians  
308 were used (instead of means) to reduce the effect of large outliers. Data before the first trough and after  
309 the last trough were discarded to avoid edge effects.

310 Locomotor activity was recorded using passive infrared motion sensors (Visonic, K940) and  
311 Clocklab software (RRID:SCR\_014309). The mid-point of locomotor activity was determined by wavelet  
312 analysis on each day of recording. Midpoints were used because the onset of locomotor activity is poorly  
313 defined using motion sensors (relative to running wheel onsets).

314

### 315 **Assessing Routes of Administration of Luciferin.**

316 To determine whether rhythmic substrate intake influences the pattern of bioluminescence, we  
317 compared the time of peak bioluminescence between animals receiving continuous administration of  
318 substrate (from a subcutaneous osmotic minipump) with trials in which mice received D-luciferin in the  
319 drinking water (2 mM) and implantation of a PBS-filled osmotic pump.

320 Liver reporter mice previously housed in 12L:12D were entrained to a skeleton photoperiod  
321 (SPP) consisting of four 1-hour light pulses. A skeleton photoperiod provides additional periods of  
322 darkness in which to record bioluminescence. The use of a 4-pulse SPP (rather than the more typical 2-  
323 pulse SPP) was based on preliminary studies indicating a 4-pulse SPP could more consistently cause  
324 phase advances of locomotor activity following an advance shift of the lighting cycle. In this 4-pulse SPP,  
325 illumination occurred in four 1-hour blocks within the light phase in the preceding lighting cycle (e.g.,  
326 lights were on from ZT 0-1, 2-3, 9-10, and 11-12, so the first and last hours of light in SPP coincided with  
327 the first and last hours of illumination in the full photocycle (with lights on ZT0-12 and lights off ZT12-  
328 24/0).

329 On the seventh day of SPP entrainment, mice were given analgesics (0.05 mg/kg Buprenorphine  
330 and 2.0 mg/kg Meloxicam), anesthetized with 3% isoflurane, shaved from hips to shoulders, and a primed  
331 osmotic minipump (Alzet Model #1002, 0.25 $\mu$ l per hour, 14 day) containing D-luciferin (100 mM  
332 dissolved in PBS) or PBS vehicle was implanted subcutaneously. Mice were returned to their cages with a

333 warming disc and were provided soft food during the first 24 hours of recovery. Animals were placed into  
334 the LumiCycle *In Vivo* unit 2.5 days after surgery. Bioluminescence was recorded in SPP lighting for 2.5  
335 days, then lights were disabled at the time of lights-out. The time of peak bioluminescence was  
336 determined by wavelet analysis on the first day in constant darkness. No difference in peak time of  
337 bioluminescence was found (see Results); in subsequent studies of ambulatory Liver reporter mice, D -  
338 luciferin (2 mM) was administered in the drinking water.

339

#### 340 **Re-entrainment following a Phase Shift of the Skeleton Photoperiod.**

341 Liver reporter mice (*Albumin-Cre; Dbp<sup>KI/+</sup>*) previously entrained to LD were transferred to the  
342 skeleton photoperiod for several days. Mice were anesthetized with isoflurane and shaved 2.5 days prior  
343 to placement in the LumiCycle *In Vivo* units. D-Luciferin (2 mM) was provided in the drinking water.  
344 Skeleton photoperiod lighting conditions were either maintained at the initial pattern or advanced by 6 hr  
345 after the second day of recording. Locomotor activity was detected by passive infrared motion sensors.

346 The circadian time of peak bioluminescence and the mid-point of locomotor activity were  
347 determined by wavelet analysis on each day of recording. We used the midpoint of locomotor activity  
348 because activity onset was not easily defined using motion sensors. The timing of bioluminescence and  
349 locomotor activity rhythms was normalized to the timing of these rhythms on Day 2 (e.g., the last day  
350 before shifting the lighting cycle in the shifted group) for each animal. Data are expressed as mean  $\pm$   
351 SEM for each lighting condition and endpoint on each day. Data from each lighting group were analyzed  
352 separately using a general linear model with Animal ID as a random variable (allowing comparison of the  
353 two rhythms within individuals) and the main effects of the endpoint measure (locomotor activity or  
354 bioluminescence) and Day number, and the 2-way interaction Measure\*Day. In animals not undergoing a  
355 phase shift, potential changes in the timing of the locomotor or bioluminescence rhythm were assessed  
356 separately for either measure by testing the influence of Day number.

357

#### 358 **Food Restriction Followed by Bioluminescence Recording.**

359 Liver reporter mice (*Albumin-Cre; Dbp<sup>KI/+</sup>*) were fed pellets (300 mg, Dustless Precision Pellets,  
360 Rodent, Grain-Based, F0170, BioServ, Flemington, NJ, USA) through the Actimetrics timed feeding  
361 apparatus designed by Phenome Technologies, Skokie, IL, USA. Pellets were spaced by a minimum of 10  
362 minutes to prevent hoarding behaviour (Acosta-Rodriguez et al., 2017). Liver reporter animals were  
363 randomly assigned to treatment groups and recording boxes. Three groups were studied: those with *ad*  
364 *libitum* access to food, those with feeding restricted to the light phase of the LD cycle (daytime feeding),  
365 and mice with access to food restricted to the dark phase of the LD cycle (nighttime feeding). Mice were  
366 weighed regularly to ensure body weight did not decrease below 95% of initial weight. All mice were  
367 kept on a 12L:12D lighting schedule during the period of food manipulation, and then were released into  
368 constant darkness with D-luciferin (2mM) in the drinking water for bioluminescence recording. During  
369 the LD period, data were collected on feeding, light levels, and locomotor behavior (using motion  
370 sensors). Three days before entering the LumiCycle *In Vivo* units, cage bottoms were changed at dark  
371 onset. *Ad libitum* and night-fed mice were placed into the LumiCycle *In Vivo* units at dark onset with food  
372 immediately available. Day-fed mice were placed into the LumiCycle *In Vivo* units at dark onset but were  
373 provided food after 12 hours (at the time of light onset in the previous LD cycle) to continue the daytime  
374 feeding regime during the first day of the recording period. Bioluminescence was recorded for 7 days.

375 Experimental groups and controls ran in parallel over five cohorts lasting 3 months. 24 hours  
376 prior to placement in the recording boxes, mice were shaved from hips to shoulders on their front and  
377 back under 3% isoflurane and returned to their cages. Mice were provided with D-luciferin (2mM) in the  
378 drinking water 6 hours prior to placement into the LumiCycle *In Vivo* units, to enable instantaneous  
379 bioluminescence upon recording onset.

380 The center of gravity (COG) of food intake was calculated for each animal for the last 5 days in  
381 LD (e.g., the last 5 days of the feeding regimen). Food intake patterns were also independently assessed  
382 qualitatively by four observers. These assessments led to identification of three cohorts of mice, based on  
383 food intake patterns. Three mice were identified as clear outliers compared to these three cohorts based on  
384 visual inspection of the food intake timing. In line with this qualitative assessment, the feeding COG of



385 each of these 3 animals was >2 h removed from the other animals in their cohort. These three animals  
386 were excluded from cohort-based assessments. Peak of bioluminescence on each day was calculated by  
387 DWT analysis as above. Missing data resulted from inability to define a time of peak bioluminescence on  
388 some days. Hair regrowth contributed to loss of signal and loss of rhythm amplitude, and thus to missing  
389 data in some cases.

### 390 **Data and Materials Availability**

391 Requests for research materials should be directed to Dr. David Weaver. Underlying data are  
392 available from Dr. Weaver on request.

393

### 394 **Results**

395 **Generation of a bifunctional reporter mouse.** CRISPR/Cas9 genome editing was used to introduce a  
396 bifunctional reporter into the mouse *Dbp* locus (**Fig. 1**). The reporter consists of a T2A sequence (to allow  
397 expression of separate proteins from a single transcript), a destabilized, enhanced GFP (d2EGFP,  
398 hereafter GFP) sequence flanked by loxP sites, and a codon optimised synthetic firefly *luciferase* (*Luc2*  
399 from *Photinus pyralis*, hereafter luc). In the absence of *Cre* expression, DBP and GFP are expressed as  
400 separate proteins. After CRE-mediated recombination, the floxed GFP is removed, and separate DBP and  
401 luciferase proteins are expressed from the *Dbp* locus. Sequencing of genomic DNA confirmed successful  
402 generation of the *Dbp*<sup>KI</sup> conditional reporter allele.

403 A non-conditional reporter allele was generated by breeding to combine the conditional *Dbp*<sup>KI</sup>  
404 allele with *Cre*-recombinase expressed in the germline (of a female *Prrxl-Cre* mouse), leading to  
405 germline excision of GFP. We refer to this non-conditional allele, which expresses luciferase wherever  
406 *Dbp* is expressed, as *Dbp*<sup>Luc</sup>.

407

408 **Molecular and Behavioral Rhythms in Mice with *Dbp* Reporter Alleles.** To confirm that the  
409 introduction of the reporter construct into the *Dbp* locus did not alter circadian clock function, molecular



410 and behavioral rhythms were assessed. Mice used for these analyses had either one or two copies of the  
411 GFP-containing conditional allele ( $Dbp^{KI/+}$  and  $Dbp^{KI/KI}$ , respectively), one or two copies of the luciferase-  
412 expressing allele ( $Dbp^{Luc/+}$  and  $Dbp^{Luc/Luc}$ , respectively), or were wild-type (WT) littermate controls.

413 RNA was isolated from male livers collected at 4-h intervals over 24-h in a 12L:12D (LD)  
414 lighting cycle. Northern blots were prepared and probed for *Dbp* and *Actin* (loading control). As expected,  
415 the transcripts from  $Dbp^{KI}$  and  $Dbp^{Luc}$  alleles migrated more slowly than the wild-type transcript (**Fig.**  
416 **2A**), due to inclusion of GFP and luciferase coding sequence in these transcripts, respectively, as verified  
417 by probing for reporter sequences in a separate blot. Peak levels of *Dbp* expression in liver occurred at  
418 ZT10 in all genotypes (**Fig. 2B, 2C**), as expected based on previous studies<sup>3,42,57</sup>. For each transcript type,  
419 the *Dbp/Actin* ratios were ranked within each series of 6 timepoints. These ranks differed significantly  
420 among the timepoints for each transcript (Friedman's One-Way analysis of variance,  $p < 0.002$ ), and post-  
421 hoc testing indicated significantly higher rankings at ZT10 than at ZT2, ZT18 and ZT22 (Dunn's test,  $p <$   
422  $0.05$ ; Fig 2D-2F). These data indicate that the temporal profile of transcript expression from the *Dbp*  
423 locus was unaffected by the inclusion of reporter sequences.

424 Heterozygous mice expressed both *Dbp* and *Dbp-plus-reporter* transcripts. The two transcript  
425 types did not differ in abundance: optical density over film background of the  $Dbp^{KI}$  transcript was  $100.5$   
426  $\pm 5.3$  % of the  $Dbp^+$  transcript in  $Dbp^{KI/+}$  mice ( $t=0.084$ ,  $df=7$ ,  $p=0.94$ , one-sample t-test vs 100%), while  
427 the  $Dbp^{Luc}$  transcript was  $102.3 \pm 5.0$  % of  $Dbp^+$  transcript in  $Dbp^{Luc/+}$  mice ( $t=0.446$ ,  $df=7$ ,  $p=0.669$ ). The  
428 equivalent expression level of the two transcript types in heterozygous animals strongly suggests that  
429 transcript regulation and stability were not altered by inclusion of reporter-encoding sequences.

430 Locomotor activity rhythms were assessed in constant darkness in mice of both sexes in the same  
431 five genotypes (**Table 1; Fig. S1**). We found a significant sex-by-genotype interaction ( $F_{4,102} = 2.904$ ,  $p =$   
432  $0.0254$ ). Post-hoc tests indicated an unexpected sex difference in the  $Dbp^{Luc/Luc}$  mice. Indeed, when this  
433 genotype was excluded from the analysis, no significant sex-by-genotype interaction was observed ( $F_{3,88}$   
434  $= 1.349$ ;  $p = 0.2636$ ) and one-way ANOVA did not find a significant main effect of genotype ( $F_{3,91} =$   
435  $1.174$ ;  $p = 0.3242$ ). One-way ANOVA within each sex with all five genotypes included revealed no

436 genotype effect in males ( $F_{4,50} = 1.299$ ,  $p = 0.283$ ). While there was a significant genotype effect in  
437 females ( $F_{4,52} = 2.716$ ,  $p = 0.040$ ), Tukey HSD post-hoc tests did not find a significant result among any  
438 of the pairwise genotype comparisons (all  $p$  values  $> 0.05$ ). Similarly, an alternative post-hoc analysis  
439 revealed that none of the other female genotypes differed from WT females in their free-running period in  
440 constant darkness (Dunnett's test,  $p > 0.5$  in each case). To further examine the effect of sex on free-  
441 running period, males and females of each genotype were compared directly. In both  $Dbp^{Luc/Luc}$  and  
442  $Dbp^{KI/KI}$  mice, males had significantly longer periods than females ( $p < 0.01$ ), while there was no sex  
443 difference in wild-types or heterozygous reporters ( $p > 0.46$ ).

444 Together, these assessments of molecular and behavioral rhythms indicate that the reporter alleles  
445 do not change  $Dbp$  expression or appreciably alter circadian function.

446

447 **GFP expression from the  $Dbp^{KI}$  allele.** To examine expression of GFP from the conditional allele,  
448  $Dbp^{KI/+}$  mice (n=5-6 mice per time-point) were anesthetized and perfused with fixative at 4-h intervals  
449 over 24 h (**Fig. S2**). Liver sections from  $Dbp^{KI/+}$  and control (WT) mice were examined by confocal  
450 microscopy. Fluorescence signal intensity did not differ between time-points (ANOVA  $F_{5,26} = 1.279$ ,  $p =$   
451  $0.7560$ ). GFP signal from  $Dbp^{KI/+}$  liver sections was 5-10x higher than from WT sections, but absolute  
452 levels were quite low. The low level of GFP expression may be due to the use of destabilized GFP with a  
453 2-hour half-life, intended to more accurately track changes on a circadian time-scale. The relatively low  
454 level and lack of detectable rhythmicity in GFP expression was unexpected, especially considering that  
455 liver is the tissue with the highest levels of  $Dbp$  expression (Fonjallaz et al., 1996) and thus may represent  
456 a 'best-case' scenario. As the primary objective of this project was to generate a mouse model with  $Cre$ -  
457 dependent expression of bioluminescence from the  $Dbp$  locus, however, the absence of robust GFP-  
458 driven fluorescence rhythms in  $Cre$ -negative cells did not preclude achieving this objective. GFP is  
459 effectively serving as a 'floxed stop' to make luciferase expression from the  $Dbp$  locus exclusively  $Cre$ -  
460 dependent.

461

462 **Non-conditional luciferase expression from the *Dbp<sup>Luc</sup>* allele.** The *Dbp<sup>Luc</sup>* allele produces widespread,  
463 rhythmic luciferase expression, both *in vivo* and *ex vivo*. More specifically, explants of lung and anterior  
464 pituitary gland from *Dbp<sup>Luc/+</sup>* mice incubated with D-luciferin had robust circadian rhythms in  
465 bioluminescence (**Fig. 3**). Furthermore, *in vivo* imaging of *Dbp<sup>Luc/+</sup>* mice at 7 time-points over a ~30-h  
466 period revealed rhythmic bioluminescence in the abdomen and throat in ventral views, and in the lower  
467 back in dorsal views (**Fig. 4B**), similar to the distribution of bioluminescence signal from *Per2<sup>Luciferase/+</sup>*  
468 (Tahara et al., 2012) and *Per2<sup>LucSV/+</sup>* mice (van der Vinne et al., 2018; van der Vinne et al., 2020) (**Fig.**  
469 **4A**). The level of light output was ~2.5-fold greater in ventral views than in dorsal views ( $p < 0.0001$ ,  
470 Wilcoxon matched pairs test,  $W=151$ ,  $n=17$ ). In the abdomen, a rostral (“liver”) region of interest (ROI)  
471 accounted for  $46.6 \pm 3.0\%$  (Mean  $\pm$  SEM;  $n=17$ ) of bioluminescence from the ventral view, while the  
472 lower abdomen contributed another  $38.4 \pm 3.5\%$ . Bioluminescence rhythms from the throat region of  
473 *Per2<sup>Luciferase</sup>* mice have previously been shown to originate in the submandibular gland (Tahara et al.,  
474 2012). Bioluminescence was absent in mice with wild-type *Dbp* alleles or with the conditional *Dbp<sup>KI</sup>*  
475 allele (in the absence of *Cre*).

476 Previous reports have shown that in a number of tissues, *Dbp* RNA levels peak earlier than *Per2*  
477 RNA levels (Punia et al., 2012; Zhang et al., 2014). Consistent with this literature, the time of peak of  
478 bioluminescence rhythms from *Dbp<sup>Luc/+</sup>* tissues preceded the time of peak of bioluminescence rhythms  
479 from *Per2<sup>LucSV/+</sup>* tissues by ~ 6 hours in explants (**Fig. 3C, 3F**) and by ~ 9 hr *in vivo* (**Fig. 4G-4I**).  
480 Bioluminescence rhythms from *Per2<sup>LucSV/+</sup>* tissue explants had significantly longer period than explants  
481 from *Dbp<sup>Luc/+</sup>* mice (Lung:  $25.29 \pm 0.13$  vs  $23.93 \pm 0.11$  h;  $F_{1,27.7} = 95.55$ ,  $p < 0.0001$ ; Anterior Pituitary:  
482  $25.27 \pm 0.08$  vs  $23.73 \pm 0.112$  h;  $F_{1,24.53} = 66.12$ ,  $p < 0.0001$ ).

483  
484 **Cre-dependent Luciferase Expression in Liver.** The main use we envision for the *Dbp* reporter alleles  
485 involve *Cre* recombinase-mediated excision of GFP, leading to expression of *luciferase* in cells  
486 expressing *Cre*. The effectiveness of this approach was first assessed in hepatocytes using an *Albumin-*  
487 *Cre*-driver line. *In vivo* bioluminescence imaging of intact *Albumin-Cre<sup>+</sup>*; *Dbp<sup>KI/+</sup>* “liver reporter” mice at

488 the time of expected maximal bioluminescence revealed that  $96.6 \pm 0.48\%$  of light originated in the  
489 “liver” ROI (relative to total ventral-view bioluminescence;  $p < 0.0001$  versus  $46.6 \pm 3.0\%$  in *Dbp<sup>Luc</sup>* mice,  
490 U-test,  $U=0$ ,  $n=19$  and  $17$ , respectively). Notably, post-mortem imaging after dissection confirmed that  
491 bioluminescence originated exclusively from the liver in these mice ( $97.4\%$  of light from liver;  $n=12$ ).

492 In a separate cohort of liver reporter mice, bioluminescence was assessed around the clock by  
493 IVIS imaging. The cosinor-fitted time of peak of *Dbp*-driven bioluminescence rhythms from the liver  
494 ‘region of interest’ of these mice (ZT11) was indistinguishable from the peak time of the liver ROI  
495 analyzed in whole-body *Dbp<sup>Luc</sup>* mice (**Fig. 4I**).

496

497 **Cre-dependent Luciferase Expression in Kidney.** Viral introduction of rhythmic luciferase reporters to  
498 the liver has been used previously (Saini et al., 2013, Sinturel et al., 2021), so our success with detecting  
499 bioluminescence rhythms specifically from the liver in *Albumin-Cre<sup>+</sup>; Dbp<sup>KI/+</sup>* “liver reporter” mice was  
500 reassuring, but not surprising. With reporter genes expressing from multiple tissues (e.g., *Dbp<sup>Luc</sup>* and  
501 *Per2<sup>Luc</sup>*), the contribution made by surrounding organs may be unclear. To extend our demonstration of  
502 tissue-specific luciferase expression from the conditional *Dbp<sup>KI</sup>* allele, we examined bioluminescence  
503 from anesthetized *Ksp1.3-Cre; Dbp<sup>KI/+</sup>* “kidney reporter” mice. The *Ksp1.3-Cre* driver leads to  
504 recombination in the developing kidney and urogenital tissues, and in renal tubules of adult mice. In male  
505 kidney reporter mice, IVIS imaging of anesthetized, dissected living mice revealed bioluminescence from  
506 the kidney and seminal vesicles *in situ* (**Fig. S3, S4**). In females, bioluminescence originated from the  
507 kidney and proximal ureter (**Fig. S5**). We thus used female mice to assess rhythmicity. Clear diurnal  
508 rhythmicity in bioluminescence was apparent from the kidney (Friedman’s One-Way Analysis of  
509 Variance, ( $F_r = 32.71$ ,  $k=5$ ,  $n=9$ ,  $p < 0.0001$ , see **Fig. S6**), with a peak at ZT8. Dunn’s test revealed that ZT8  
510 timepoint differed significantly from ZT0 and ZT18 but not from ZT4 and ZT14 (multiplicity-corrected,  
511 two-tailed Dunn’s test; see **Fig. S6**).

512

513 **Cell-type Specific Bioluminescence Rhythms in SCN Slices.** The heterogeneity of SCN neurons has  
514 important functional implications for our understanding of the central circadian clock (Herzog et al.,  
515 2017). Neuromedin S (NMS) is expressed in ~40% of SCN cells, while Arginine Vasopressin (AVP) is  
516 expressed in ~10% of SCN neurons and is contained within the NMS-expressing population (Lee et al.,  
517 2015). The utility of our conditional reporter line was demonstrated by monitoring bioluminescence  
518 rhythms within specific subpopulations of SCN neurons (**Fig. 5**). *NMS-iCre; Dbp<sup>KI/+</sup>* mice and *AVP-*  
519 *IRES2-Cre; Dbp<sup>KI/+</sup>* mice were generated, and single-cell bioluminescence rhythms were compared to  
520 those from non-conditional *Dbp<sup>Luc/+</sup>* mice in SCN slices *ex vivo*. For the conditional mice,  
521 bioluminescence was apparent in subsets of cells within the SCN (**Fig. 5A**). The anatomical pattern of  
522 bioluminescence in the SCN differed based on the *Cre* line used, consistent with the expected distribution  
523 for each neuronal subtype. In each slice, rhythmic ROI's were readily apparent (**Fig. 5B**).

524 The cell-type specificity of bioluminescence signals from the different genotypes enabled the  
525 assessment of rhythm quality in the different neural populations. This assessment revealed a significantly  
526 shorter period in AVP<sup>+</sup> cells compared to NMS<sup>+</sup> cells (**Fig. 5C, Fig. 5D**;  $F_{2,14.64} = 4.259, p = 0.0345$ ). The  
527 time of peak of *Dbp*-driven bioluminescence did not differ significantly between the different cellular  
528 populations examined (**Fig. 5E**;  $F_{2,18.31} = 0.6570, p = 0.5302$ ), while a reduction in rhythm robustness was  
529 observed in AVP<sup>+</sup> neurons compared to rhythms of NMS<sup>+</sup> neurons as well as compared to all cells (**Fig.**  
530 **5F**;  $F_{2,18.11} = 14.34, p = 0.0002$ ). The distribution of peak times was also more dispersed in AVP<sup>+</sup> cells  
531 compared to NMS<sup>+</sup> cells (**Fig. 5G**).

532 These results complement the recent report from Shan *et al.* (2020) using a *Cre*-dependent Color-  
533 Switch PER2::LUC reporter mouse demonstrating period and phase differences among sub-populations  
534 of SCN neurons. Our *Dbp<sup>KI</sup>* mice and the recently reported Color-Switch PER2::LUC mouse line (Shan *et*  
535 *al.*, 2020) will be important additions to our molecular-genetic armamentarium for unravelling the  
536 complicated relationships among the cellular components of the SCN circadian pacemaker<sup>58-64</sup>.

537

538 **Route of Substrate Administration.**

539 Monitoring peripheral organ circadian phase following disruptive environmental, surgical or  
540 genetic conditions will require long-term monitoring of peripheral rhythms in ambulatory mice. Studies  
541 using substrate delivery by mini-osmotic pump or infusion pump allow constant substrate administration  
542 but require surgery and, in the case of mini-osmotic pumps, are limited by the pump volume. Therefore,  
543 administration of luciferase substrate in the drinking water would be preferable. Thus, we examined the  
544 potential impact of route of substrate administration on rhythm phase using the Lumicycle *In Vivo* system  
545 (Actimetrics, Wilmette IL) in *Albumin-Cre; Dbp<sup>KII+</sup>* (“liver reporter”) mice. Mice were entrained to LD  
546 followed by a skeleton photoperiod consisting of four 1-h pulses of light every 24 hr  
547 (1L:1D:1L:6D:1L:1D:1L:12D) with the 12-h dark phase coinciding with 12-h dark phase of the  
548 preceding LD cycle. A skeleton photoperiod was used because detection of bioluminescence requires the  
549 absence of ambient light, while studies of light-induced phase shifting obviously require light; a skeleton  
550 photoperiod is a compromise between these conflicting constraints. After 7 days in the skeleton  
551 photoperiod, mice were anesthetized for subcutaneous implantation of a primed osmotic minipump  
552 (Alzet, Model #1002 (0.25 $\mu$ l per hour)) containing either D-luciferin (100 mM) or phosphate buffered  
553 saline (PBS). Mice with PBS-containing pumps received D-luciferin in the drinking water (2 mM).  
554 Rhythms of bioluminescence were readily detected under these conditions (**Fig. S7**). The time of peak  
555 bioluminescence was determined by discrete wavelet transform (DWT) analysis on the first day of  
556 exposure to constant darkness (5 days after pump implantation). There was no difference in time of peak  
557 between these routes of administration (drinking water: mean peak time ( $\pm$  SEM) CT  $8.75 \pm 0.20$  (n = 7);  
558 osmotic minipumps: mean peak time CT  $8.76 \pm 0.19$  (n=7); unpaired t-test, t = 0.0342, df =12, p =  
559 0.9733). Thus, the presumed rhythm of substrate intake, secondary to the rhythm of water intake, does not  
560 change the time of peak of the bioluminescence rhythm. This is consistent with recent results from  
561 Sinturel et al., (2021) and Martin-Burgos et al., (2022) using *PER2<sup>Luciferase</sup>* mice. Subsequent studies used  
562 D-luciferin (2 mM) administered in the drinking water.  
563

564 **Circadian Misalignment Following a Phase Shift of the Lighting Cycle.** The approach described  
565 above provides an unparalleled system for assessing the timing of rhythmicity in a specific tissue over  
566 long periods of time. Next, hepatic bioluminescence rhythms were monitored in *Albumin-Cre; Dbp<sup>KI/+</sup>*  
567 (liver reporter) mice before and after a 6-hr phase advance of the skeleton lighting cycle. Mice that  
568 remained in the original (non-shifted) skeleton lighting regimen had a stable phase of hepatic  
569 bioluminescence (**Fig. 6C**). In contrast, mice exposed to a phase-advance of the skeleton photoperiod  
570 displayed a gradual phase-advance in both locomotor activity and hepatic bioluminescence rhythms (**Fig.**  
571 **6A, B**). Notably, locomotor rhythms shifted more rapidly than hepatic bioluminescence (**Fig. 6B**). To  
572 compare the re-entrainment of bioluminescence and locomotor activity rhythms, peak time for each  
573 rhythm each day was normalized to the time of peak on the last day before shifting the lighting cycle in  
574 the shifted group (e.g., Day 2 in **Fig. 6**) for each animal. Data from each lighting group were analyzed  
575 separately using a general linear model with Animal ID as a random variable (allowing comparison of the  
576 two rhythms within individuals) and the main effects were endpoint (locomotor activity or  
577 bioluminescence) and Day number. In animals not undergoing a phase shift, the phase relationship of  
578 these endpoints was unchanged over time ( $F < 1.1, p > 0.39$ ). In contrast, in animals exposed to a 6-hr  
579 phase advance, the phase relationship of the locomotor activity and bioluminescence rhythms differed  
580 significantly (Measure\*Day interaction,  $F_{9,54.98} = 3.358, p = 0.0024$ ). Post-hoc testing revealed a  
581 significant difference in phase between the two measures on day 9 (Tukey HSD,  $p < 0.05$ ). A separate  
582 analysis to compare phase (relative to Day 2 baseline) between bioluminescence and locomotor activity  
583 rhythms revealed significant differences between the two measures on days 5, 6, 7, 8, 9 and 10 (t-tests on  
584 each day,  $p < 0.05$ ). Thus, both locomotor activity and hepatic bioluminescence rhythms shifted following  
585 a phase shift of the lighting cycle, but the rhythms differ in their kinetics of re-adjustment: liver lagged  
586 behind. These data provide clear evidence for misalignment of SCN-driven behavioral rhythms and  
587 hepatic rhythmicity.  
588



589 **Recovery from Circadian Misalignment Induced by Temporally Restricted Feeding.** We next  
590 conducted a study to examine misalignment induced by restricted feeding. Previous studies have shown  
591 that food availability limited to daytime significantly alters phase of peripheral oscillators (Damiola et al.,  
592 2000; Hara et al., 2001; Stokkan et al., 2001; Saini et al., 2013). Due to our desire to study  
593 bioluminescence rhythms without interference from the LD cycle, we administered different feeding  
594 regimens in an LD cycle and then assessed the hepatic bioluminescence rhythm after release to DD with  
595 *ad libitum* food. This allowed us to determine the time of peak bioluminescence of the liver after  
596 restricted feeding, and the opportunity to continuously observe its return toward a normal phase  
597 relationship with SCN-driven behavioral rhythms over time.

598 *Alb-Cre;Dbp<sup>Kl/+</sup>* liver reporter mice were exposed to one of three feeding regimes (*ad libitum*,  
599 nighttime, or daytime food availability; **Fig. 7A**) for ten days in LD before recording bioluminescence in  
600 DD with *ad libitum* food availability. A previously described automated feeder system (Acosta-Rodriguez  
601 et al., 2017) was used to restrict food availability. This system limits total daily consumption (to prevent  
602 hoarding) and restricted food pellet delivery for day-fed mice to 0600-1800 h (ZT0-ZT12), and for night-  
603 fed mice to 1800-0600 h (ZT12 – ZT24/0). With the setting used, the system restored daily food  
604 allotments to *ad libitum* fed and night-fed mice daily at 0000h (ZT18), resulting in unusual temporal  
605 profiles of food intake in *ad libitum* and night-fed mice. Nevertheless, *ad libitum* and nighttime food  
606 access both resulted in food intake being concentrated in the night, while daytime food availability  
607 resulted in the midpoint of food intake occurring during the first half of the light phase (**Fig. 7A, 7B, 7C**).  
608 Within-group variability in the timing of food intake was low except for three clear outliers (**Fig. 7C**) that  
609 were excluded from subsequent analyses.

610 *Ad libitum* fed mice showed consistently phased rhythms in bioluminescence after transfer to DD  
611 from LD, as did night-fed animals (**Fig. 7A, 7D**). In contrast, mice fed only during the light period for 10  
612 days prior to housing in DD with *ad libitum* food had an earlier peak time of the hepatic bioluminescence  
613 rhythm. Daytime feeding resulted in a significantly advanced peak time compared to both night-fed and  
614 *ad libitum* fed mice, while these latter groups were statistically indistinguishable ( $F_{2,259.6} = 76.66, p <$



615 0.0001; **Fig. 7D**). Subsequent exposure to DD with *ad libitum* feeding allowed the hepatic clock of day-  
616 fed mice to return toward the appropriate phase relationship with the locomotor activity rhythm.

617 Although daytime feeding resulted in an advanced time of peak bioluminescence, the timing of  
618 the liver bioluminescence rhythm was not solely controlled by the timing of food intake. First, no  
619 significant correlations between the timing of food intake and time of peak bioluminescence were  
620 observed within any of the three feeding regimes ( $F < 1.13$ ,  $p > 0.32$ ; **Fig. 7C**). Second, the relationship  
621 between the timing of liver bioluminescence rhythms relative to the midpoint of food intake was  
622 significantly different between the different groups ( $F_{2,17} = 313.2$ ,  $p < 0.0001$ ; **Fig. 7E**). While *Dbp*-driven  
623 hepatic bioluminescence rhythms were roughly in anti-phase with the midpoint of feeding in *ad libitum*  
624 and night-fed mice, daytime feeding resulted in near synchrony between these rhythms (**Fig. 7E**).  
625 Furthermore, although the average midpoint of feeding was significantly earlier in night-fed compared to  
626 *ad libitum* fed mice ( $t_{10} = 6.21$ ,  $p < 0.0001$ ; **Fig. 7C**), no significant difference was observed in  
627 bioluminescence phase relative to the preceding light-dark cycle (**Fig. 7D**), with the timing of liver  
628 bioluminescence rhythms relative to the midpoint of food intake being significantly delayed in night-fed  
629 compared to *ad libitum* fed mice (**Fig. 7E**). Overall, these results demonstrate that although the timing of  
630 food intake strongly influences liver rhythms, the timing of bioluminescence rhythmicity in liver reporter  
631 mice is not solely driven by the timing of food intake (with food intake regulated for this duration and in  
632 this way).

633

## 634 **Discussion**

635 Numerous studies have made use of rhythmically expressed bioluminescent reporter genes to  
636 monitor circadian rhythms. The *Per2<sup>Luciferase</sup>* mouse and other reporters with bioluminescence under the  
637 control of a clock gene have been especially useful as they generate robust bioluminescence rhythms from  
638 numerous tissues recorded *ex vivo* (Abe et al., 2002; Maywood et al., 2013; Yakazami et al., 2000;  
639 Yamazaki and Takahashi, 2005; Yoo et al 2004; Yoo et al., 2005). The widespread expression of  
640 PER2::LUCIFERASE (and other ‘non-conditional’ bioluminescence reporters) comes at a cost, however,

641 as it is not possible to assess rhythmicity in specific cell populations within a larger tissue without  
642 dissection. Tissue explant preparation can cause phase-resetting, however, especially after exposure to  
643 phase shifting stimuli (Noguchi et al., 2020; Leise et al., 2020). Furthermore, *ex vivo* culturing of tissues  
644 does not allow assessment of rhythmicity in the context of the hierarchical circadian system or dynamic  
645 changes during environmentally-induced resetting.

646 Addressing issues of internal desynchrony and misalignment of oscillators requires monitoring  
647 the dynamics of tissue resetting over time after a phase-shifting stimulus. The use of *in vivo*  
648 bioluminescence imaging for repeated assessments of organ-level regions of interest over multiple days is  
649 feasible but requires several potentially disruptive anesthesia sessions (Poulsen et al., 2018) per circadian  
650 cycle. As a result, *in vivo* bioluminescence imaging has generally been relegated to assessing phase of  
651 reporter gene oscillations on relatively few occasions after a shifting stimulus, with rare exception (van  
652 der Vinne et al., 2020). Other methods for monitoring bioluminescence and fluorescence rhythms in  
653 ambulatory mice have been developed (Hamada et al., 2016; Mei et al., 2018; Nakamura et al., 2008; Ono  
654 et al., 2015; Saini et al., 2013; Sawai et al., 2019; Yamaguchi et al., 2016; Yamaguchi et al., 2001), but a  
655 less invasive approach for assessing rhythms in a variety of specific tissues is desirable. Notably, several  
656 abdominal organs emit significant amounts of bioluminescence in “whole-body” reporter mice, including  
657 liver, kidney and intestines. These tissues likely overshadow (or, more accurately, out-glow) surrounding  
658 tissues. Bioluminescence from even larger organs like liver and kidney is likely ‘contaminated’ by light  
659 from adjacent structures. Indeed, the size and shape of the “liver” ROI seen by IVIS imaging (Fig. 4)  
660 differs between *Dbp* liver reporter mice and whole-body reporter *Dbp<sup>Luc</sup>* mice. These considerations  
661 underline the benefits of generating a *Cre*-conditional reporter mouse in which recombination leading to  
662 bioluminescence can be directed to specific tissues and cell types.

663 We chose to modify the *Dbp* gene to generate a conditional reporter for several reasons. *Dbp* is  
664 widely and rhythmically expressed at readily detectable levels (Fonjallaz et al., 1996; Punia et al., 2012;  
665 Zhang et al., 2014). This feature ensures that the reporter mouse would be useful for detecting rhythmicity  
666 in numerous tissues. In addition, individual clock genes are responsive to different signaling pathways.

667 This differential regulation can lead to circadian misalignment *within* the circadian clock (Reddy et al.,  
668 2002; Nicholls et al., 2019). As an output gene controlled by the CLOCK:BMAL1 transcriptional  
669 activator complex (Ripperger & Schibler 2006; Stratmann et al., 2012), *Dbp* rhythmicity is likely a good  
670 proxy for the integrated output of the molecular clockwork. Additional *cis*-acting elements regulating *Dbp*  
671 expression have been identified, however. Binding of hnRNP K to a poly-(C) motif in the proximal  
672 promoter has been implicated in high-amplitude expression of *Dbp* (Kwon et al., 2019; Kwon et al., 2020).  
673 Interestingly, *Dbp* appears to be insensitive to acute regulation by activation of signal transduction  
674 pathways. Unlike *Per1* and *Per2*, *Dbp* gene expression is not increased in the mouse SCN following  
675 exposure to light at night (Yan et al., 2000). Furthermore, *Dbp* expression is not acutely increased by  
676 horse serum or stimulation of the cAMP/PKA pathway by forskolin, which rapidly induce *Per1* (Yagita  
677 & Okamura, 1999) and resynchronize molecular rhythms. Thus, *Dbp* expression and the *Dbp*-based  
678 reporter are likely to represent the status of the molecular clock without interference by other influences.  
679 Finally, concern that the targeting event could disrupt function of the modified gene led us to steer away  
680 from core clock genes. Mice homozygous for a targeted allele of *Dbp* have only a modest circadian  
681 phenotype (Lopez-Molina et al., 1997). Homozygotes of both the *Per2<sup>LucSV</sup>* and *Per2<sup>Luciferase</sup>* lines have  
682 altered circadian rhythms (Ralph et al., 2020; Yoo et al., 2017; see below). The GFP-expressing *Dbp*  
683 transcript lacks the native 3' UTR and uses an exogenous polyadenylation sequence, which could affect  
684 *Dbp* gene expression and regulation. Notably, however, our Northern blot analysis suggests little or no  
685 alteration in expression level or dynamics of the *Dbp* reporter transcripts.

686 Yoo et al. (2017) reported that homozygous *Per2<sup>LucSV/LucSV</sup>* mice (in which a SV40  
687 polyadenylation site is used instead of the endogenous *Per2* 3' UTR) have a longer period length of  
688 locomotor activity rhythms in DD and explant bioluminescence rhythms *ex vivo* than the more widely  
689 used *Per2<sup>Luciferase</sup>* reporter. The potential impact of a single *Per2<sup>LucSV</sup>* allele (as used in our studies) on  
690 period length has not been reported, but this could contribute to the longer period of *Per2<sup>LucSV/+</sup>* explants,  
691 relative to *Dbp<sup>Luc/+</sup>* explants. Interestingly, Ralph et al., (2020) recently reported that the *Per2<sup>Luciferase</sup>*

692 reporter that uses the endogenous *Per2* 3'UTR (Yoo et al., 2004) also has longer period in DD and other  
693 circadian phenotypes. Tosini and colleagues have also recently reported retinal degeneration and  
694 alterations in classical photoreception in aged male *Per2<sup>Luciferase/Luciferase</sup>* mice (Goyal et al., 2021).

695 Shan et al. (2020) recently reported development of a Color-Switch PER2::LUC line which was  
696 used to demonstrate the utility of a *Cre*-dependent reporter approach for interrogating SCN circuitry. The  
697 Color-Switch PER2::Luc line has the advantage of reporting on both *Cre*-positive and *Cre*-negative cells  
698 in different colors. Detection of bioluminescence from the Color-Switch PER2::LUC reporter requires  
699 segmentation of the bioluminescence signal between wavelengths. Our 'simpler' approach of only  
700 inducing a bioluminescence signal in *Cre*-positive cells of *Dbp<sup>KI/+</sup>* mice enables recording of  
701 bioluminescence rhythms without the need for wavelength segmentation. In addition, the *Dbp* reporter  
702 can easily be used in *Per2* mutant mice. Like the Color-Switch PER2::LUC line, our *Dbp* conditional  
703 reporter line is useful for *ex vivo* studies, allowing specific cellular populations to be monitored by  
704 crossing to the appropriate *Cre*-expressing lines.

705 As with the Color-Switch PER2::LUC line, we also intended to generate a bifunctional reporter.  
706 The inability to readily detect a GFP fluorescence rhythm in *Dbp<sup>KI/+</sup>* mouse SCN or liver was unexpected.  
707 It is important to emphasize that there was detectable fluorescence above baseline, but rhythmicity was  
708 not detected. This could nevertheless be due in part to low signal-to-noise ratio. It is possible that the  
709 short half-life of destabilized GFP, combined with the waveform of *Dbp* gene expression (being less  
710 sinusoidal than the rhythms of *Per1* and *Per2*, for example) contributed to a short period of production  
711 and rapid degradation of the GFP. Notably, a transgenic mouse in which a similarly destabilized GFP is  
712 driven by the *Per1* promoter generates nice SCN fluorescence rhythms (Kuhlman et al., 2000). Similarly,  
713 destabilized versions of VENUS (a yellow fluorescent protein) and DsRED inserted at the start codon of  
714 PER1 and PER2, respectively, in bacterial artificial chromosomes have been useful for monitoring  
715 rhythmic gene expression in SCN of transgenic mice (Cheng et al., 2009). Assessing immunoreactive  
716 GFP (rather than native fluorescence from GFP) in the *Dbp<sup>KI/+</sup>* or *Dbp<sup>KI/KI</sup>* mice may improve signal  
717 detection (but at the cost of real-time reporting).

718           It is possible that a different design of the reporter construct would have led to better success.  
719    Addition of a nuclear localization signal (as done by Cheng et al., 2009) would reduce the volume in  
720    which GFP is distributed, making signal intensity greater (but we note that Kuhlman et al., 2000 did not  
721    incorporate an NLS into their reporter sequence). Alternatively, generating non-destabilized GFP as a  
722    fusion protein with DBP might have been more successful; in this scenario, the stability of DBP would  
723    regulate the stability of GFP. This fusion strategy has been used successfully with fluorescent reporters of  
724    PER2 and BMAL1 (Smyllie et al., 2016; Yang et al., 2020). Another potential variation is to use  
725    fluorescent proteins other than GFP. Other fluorescent proteins may be brighter and thus more amenable  
726    to this type of study.

727           Our studies reveal subtle differences among the population of oscillators defined by *AVP-Cre*,  
728    *NMS-Cre*, and the entire SCN cohort. More specifically, AVP cells had a shorter period, reduced  
729    rhythmicity index, and larger within-slice dispersal of peak times than the NMS cell population with  
730    which it overlaps. Our results suggest that AVP cells are coordinated less well and are less robust than  
731    other populations in the SCN. This suggestion is in contrast to the typical view of AVP cells as high-  
732    amplitude ‘output’ neurons that also contribute to determination of period and rhythm amplitude (Herzog  
733    et al., 2017; Mieda et al., 2015; Mieda et al., 2016). One possible explanation for this is that AVP is  
734    dysregulated in the *Avp-Cre* line (Cheng et al., 2019), which may influence the function of the SCN as a  
735    whole in the *AVP-IRES-Cre; Dbp<sup>KI/+</sup>* genotype used here. Using an *Avp-IRES-Cre* line which does not  
736    reduce AVP expression, Shan et al. (2020) reported that AVP-expressing SCN neurons have shorter  
737    period bioluminescence rhythms, compared to the non-AVP cells. This contrasts directly with our finding  
738    of longer period in AVP cells reporting luciferase from the *Dbp* locus. The AVP neuronal population is  
739    contained entirely within the NMS-expressing population in the SCN. There is no evidence that the *Nms-*  
740    *Cre* line alters circadian timekeeping on its own (Lee et al., 2015). The *Nms-Cre* line and the *Avp-IRES-*  
741    *Cre* line used by Shan et al. (2020) appear to be preferable models to the *AVP-IRES-Cre* line (JAX  
742    023530) used here. Of note for circadian researchers, a *Vip-IRES-Cre* line also influences neuropeptide  
743    expression and circadian function (Cheng et al., 2019; Joye et al., 2020).

744 We envision this line will be very useful for monitoring additional neuronal subpopulations in the  
745 SCN in wild-type and mutant animals. Additional technical development may allow *in vivo* detection of  
746 bioluminescence rhythms from neuronal populations in awake behaving mice. Approaches to optimize  
747 the signal detected from brain include use of highly efficient and cell- and brain-penetrant substrates  
748 (Evans et al., 2014; Iwano et al., 2018), cranial windows (Miller et al., 2014) and hairless or albino mice  
749 (Martin-Burgos et al., 2020; Iwano et al., 2018). (Note, the tyrosinase mutation leading to albinism in  
750 C57BL/6J mice is linked to *Dbp* on mouse chromosome 7; we have nevertheless generated recombinants  
751 and produced albino reporters, including the kidney reporter mice in Fig. **S3**). These approaches may  
752 allow interrogation of the SCN circuit *in vivo*, extending the elegant studies being performed with SCN  
753 slices *ex vivo*. Bioluminescence rhythms can also be examined in neuronal populations outside the SCN,  
754 by using an appropriate *Cre* driver and/or viral delivery of *Cre* recombinase.

755 *Cre*-mediated recombination of the *Dbp*<sup>KI</sup> allele in liver enabled us to perform continuous, *in vivo*  
756 bioluminescence monitoring of liver in freely moving mice. These studies demonstrate transient  
757 misalignment between the liver oscillator and SCN-regulated behavioral rhythms. Our design is  
758 complementary to that used by Saini et al. (2013), who continuously monitored reporter gene  
759 bioluminescence as hepatic rhythms were shifted by an inverted feeding regimen.

760 Repeated misalignment among oscillators is thought to contribute to adverse metabolic and health  
761 consequences of chronic circadian disruption (for reviews, see Arble et al., 2015; Evans and Davidson,  
762 2013; Roenneberg and Mellow, 2016; Patke et al., 2020; West & Bechtold, 2015). Up until now,  
763 technical and practical limitations have restricted our ability to monitor the behavior of circadian rhythms  
764 in different peripheral tissues during and following environmental disruption of circadian homeostasis.  
765 Our *Cre*-conditional reporter line and the approaches described recently (Martin-Burgos et al., 2022; Tam  
766 et al., 2021), and extended here for longitudinal and tissue-specific assessment of bioluminescence  
767 rhythms *in vivo* will allow characterization of misalignment and recovery after a variety of circadian-  
768 disruptive lighting and food availability paradigms. These approaches will allow more extensive  
769 examination of the consequences of repeated misalignment of peripheral clocks.

770 The data in Figure 6 show clear misalignment between the rhythms in locomotor activity and  
771 hepatic bioluminescence. Rather remarkably, the average phase of peak bioluminescence did not shift at  
772 all for 3-4 days after the shift of the lighting cycle. This is consistent with previous work by others: even  
773 with a more robust signal that directly impacts peripheral oscillators (reversal of the time of food  
774 availability), shifting of the liver clock occurs slowly (Damiola et al., 2001; Saini et al., 2013). We did not  
775 track food intake in this experiment, so do not know the rate at which the food intake pattern was reset  
776 following the shift of the lighting cycle. The timing of food intake is typically controlled by the SCN,  
777 however, and thus would likely track locomotor activity. The food intake and locomotor activity rhythms  
778 shift to the new phase more rapidly than the hepatic oscillator, resulting in misalignment.

779 Previous studies have shown misalignment between central and peripheral clocks induced by  
780 altering the time of food access to daytime, by assessing oscillator phase at various time-points after a  
781 phase shift of the lighting cycle, or by exposure to non-24hr light-dark schedules. The vast majority of  
782 these studies monitored bioluminescence rhythms *ex vivo* or assessed transcript levels following tissue  
783 collection at various times after a shift (Balsalobre et al., 2000; Damiola et al., 2000; Davidson et al.,  
784 2008; Davidson et al., 2009; Nakamura et al., 2005; Nicholls et al., 2019; Pezuk et al., 2012; Sellix et al.,  
785 2012; Stokkan et al., 2001; Yamanaka et al., 2008). Notably, *ex vivo* bioluminescence rhythm timing may  
786 be affected by prior lighting conditions (Noguchi et al., 2020; Leise et al., 2020; Tahara et al., 2012). Few  
787 studies have followed bioluminescence rhythms *in vivo* over time after a light-induced phase shift or after  
788 a food manipulation that phase-shifts peripheral oscillators (but see Saini et al., 2013; van der Vinne et al.,  
789 2020). Our current data leverage the ability to non-invasively monitor rhythmicity from a single  
790 peripheral oscillator in individual animals over many days to show the time course of internal  
791 misalignment and recovery after a phase shift. Other studies with minimally invasive monitoring of  
792 bioluminescence rhythms have relied upon viral introduction of the reporter into liver, and thus cannot  
793 easily be extended to other tissues (Saini et al., 2013; Sinturel et al., 2021). Notably, the viral reporter  
794 appears not strictly limited to liver in this model (see Saini et al. 2013, their Fig S2). Moreover, efficient  
795 expression of virally delivered reporter constructs is limited by the promoter size and specificity, so the



796 level and anatomical pattern of expression often do not match that of the gene whose promoter was used.  
797 Future studies of additional tissues in *Cre*-conditional reporter mice will enable elucidation of how other  
798 tissues within the hierarchical, multi-oscillatory circadian system respond to disruptive stimuli. Several  
799 studies suggest that organs differ in their response to resetting stimuli. For example, the *Dbp* mRNA  
800 rhythm in liver is more fully reset than the rhythm in heart and kidneys 3 days after restricting food  
801 availability to daytime (Damiola et al., 2000), and several studies indicate the SCN (and the locomotor  
802 rhythms it regulates) resets more rapidly than peripheral tissues (Davidson et al., 2008; Davidson et al.,  
803 2009; Damiola et al., 2000; Hamada et al., 2016; Saini et al., 2013; Sellix et al., 2012; van der Vinne et  
804 al., 2020; Yamanaka et al., 2008; Yamazaki et al., 2000; see Nicholls et al., 2019 for review).

805         A recent study used a feeding device similar to the one used here (Acosta-Rodriguez et al, 2017)  
806 to recapitulate ‘naturalistic’ food intake patterns in mice with restricted food access (Xie et al., 2020). In  
807 this study, the food restriction was not the severe ‘all or none’ patterns typically used in studies with time-  
808 restricted access to food. The authors found that peripheral oscillators of *Per2<sup>Luciferase</sup>* mice were not  
809 effectively entrained by restricted feeding using the imposed ‘natural’ feeding patterns (Xie et al., 2020).  
810 Similarly, our study (shown in Figure 7) revealed that daytime restricted food access produced a smaller  
811 and more variable phase shift of the hepatic circadian clock (as indicated by the initial time-of-peak of  
812 *Dbp*-driven bioluminescence) than expected based on published results using presence / absence food  
813 availability cycles (Damiola et al., 2000; Hara et al., 2001; Saini et al., 2013; Stokkan et al., 2001).  
814 Both day-to-day variation in phase of peak bioluminescence within animals as well as variation in peak  
815 phase between animals is larger in the day-fed mice than in the night-fed and *ad lib* groups. These latter  
816 two groups did not need to change the time of food intake greatly, while the daytime-fed group was eating  
817 at an abnormal phase. Our imposing temporal restriction on feeding for only 10 days before release to DD  
818 and *ad lib* feeding may not have been sufficient to synchronize liver clocks to a new phase, as suggested  
819 by the partial reversal of the phase of hepatic bioluminescence. In addition, food intake patterns derived  
820 from presence/absence cycles of food appear much more effective at synchronizing the liver than more  
821 naturalistic food intake patterns (our data and Xie et al., 2020 compared with, for example, Saini et al.,



822 2013 and Damiola et al., 2001). The night-fed and *ad lib* groups have relatively more intense,  
823 consolidated feeding in the early part of the night, which may provide a stronger stimulus to peripheral  
824 oscillators, including liver. Food access for 12 hours during the daytime may be less concentrated and  
825 more variable in time, providing a less effective synchronizing cue to peripheral oscillators. This may  
826 lead to higher levels of within-organ desynchrony among cells and thus lower-amplitude rhythmicity,  
827 secondarily leading to greater variability in determining the time of peak bioluminescence on subsequent  
828 days. We also cannot rule out the possibility that the time of food intake differed between individuals and  
829 between the groups, even during *ad lib* feeding, and this could influence hepatic rhythms. Future studies  
830 using a shorter duration of food access per day and monitoring bioluminescence rhythms both during the  
831 acclimation to daytime feeding as well as during release to *ad lib* conditions, coupled with monitoring  
832 food intake patterns throughout the study, should allow more dynamic assessment of the entrainment and  
833 subsequent free-running rhythms of peripheral oscillators *in vivo*. In addition, use of a variety of different  
834 *Cre* drivers will allow assessment of whether different peripheral organs respond similarly to food  
835 restriction paradigms. In addition, tissue-specific reporter models will be very useful in assessing how  
836 more naturalistic food ingestion paradigms influence peripheral circadian clocks in several tissues.

837 In summary, we have demonstrated the utility of a new, *Cre*-conditional reporter mouse that  
838 enables tissue-specific monitoring of circadian molecular rhythms *in vivo* and *ex vivo*. This reporter  
839 mouse provides a major advance in our capabilities for monitoring rhythms in a variety of tissues under  
840 normal and disruptive conditions, which is a key step in the identification of mechanisms underlying the  
841 adverse consequences of circadian disruption inherent to life in modern 24/7 societies.

842

843 **Acknowledgments**

844 We thank Christopher Lambert and Jamie Black for technical assistance, and Steven A. Brown  
845 (University of Zurich) for discussions during the development of this project. UMass Chan Medical  
846 School core facilities (Mutagenesis Core, Mouse Modeling Core, and Small Animal Imaging Core) are  
847 gratefully acknowledged.

848 Research reported in this publication was supported by the National Institute for Neurological  
849 Diseases and Stroke and the National Institute of General Medical Sciences of the National Institutes of  
850 Health under award numbers R21NS103180 (DRW), SC1GM112567 (AJD), and NIGMS  
851 R15GM126545 (MEH), the Hartmann Müller Stiftung (RD), MRC MC\_PC\_15070 (RD) and BSN (RD  
852 and LAG). CBS was a participant in the UMass Chan Medical School Initiative for Maximizing Student  
853 Development, supported by NIH grant R25GM113686. The funders had no role in study design, data  
854 collection and analysis, decision to publish, or preparation of the manuscript. The content is solely the  
855 responsibility of the authors and does not necessarily represent the official views of the National Institutes  
856 of Health or the other funding agencies.

857

858 **Author Contributions**

859 R.D and D.R.W. conceived the project  
860 C.B.S., V.v.d.V., E.M., M.H.B., A.J.D., M.E.H., R.D. and D.R.W. designed research  
861 C.B.S., V.v.d.V., E.M., A.C.S., B.M.B., P.C.M., L.A.G., R.D., and D.R.W. performed research  
862 C.B.S., V.v.d.V., E.M., T.L.L., B.M.B., M.E.H., R.D. and D.R.W. analyzed data  
863 C.B.S., V.v.d.V., and D.R.W. wrote the paper  
864 All authors have approved this version of the manuscript.  
865

866 **References.**

- 867  
868 Abe M, Herzog ED, Yamazaki S, Straume M, Tei H, Sakaki Y, Menaker M, and Block GD (2002)  
869 Circadian rhythms in isolated brain regions. *J Neurosci* 22:350-356.
- 870 Acosta-Rodriguez VA, de Groot, M H M, Rijo-Ferreira F, Green CB, and Takahashi JS (2017) Mice  
871 under caloric restriction self-impose a temporal restriction of food intake as revealed by an automated  
872 feeder system. *Cell Metab* 26:267-277.e2.
- 873 Balsalobre A, Brown SA, Marcacci L, Tronche F, Kellendonk C, Reichardt HM, Schutz G, and Schibler  
874 U (2000) Resetting of circadian time in peripheral tissues by glucocorticoid signaling. *Science*  
875 289:2344-2347.
- 876 Brandes C, Plautz JD, Stanewsky R, Jamison CF, Straume M, Wood KV, Kay SA, and Hall JC (1996)  
877 Novel features of *Drosophila period* transcription revealed by real-time luciferase reporting. *Neuron*  
878 16:687-692.
- 879 Cesbron F, Brunner M, and Diernfellner AC (2013) Light-dependent and circadian transcription dynamics  
880 *in vivo* recorded with a destabilized luciferase reporter in *Neurospora*. *PLoS One* 8:e83660.
- 881 Chen Z, Yoo SH, Park YS, Kim KH, Wei S, Buhr E, Ye ZY, Pan HL, and Takahashi JS (2012)  
882 Identification of diverse modulators of central and peripheral circadian clocks by high-throughput  
883 chemical screening. *Proc Natl Acad Sci U S A* 109:101-106.
- 884 Cheng AH, Fung SW, and Cheng HM (2019) Limitations of the AVP-IRES2-Cre (JAX #023530) and  
885 VIP-IRES-Cre (JAX #010908) models for chronobiological investigations. *J Biol Rhythms* 34:634-  
886 644.
- 887 Damiola F, Le Minh N, Preitner N, Kornmann B, Fleury-Olela F, and Schibler U (2000) Restricted  
888 feeding uncouples circadian oscillators in peripheral tissues from the central pacemaker in the  
889 suprachiasmatic nucleus. *Genes Dev* 14:2950-2961.
- 890 Davidson AJ, Castanon-Cervantes O, Leise TL, Molyneux PC, and Harrington ME (2009) Visualizing jet  
891 lag in the mouse suprachiasmatic nucleus and peripheral circadian timing system. *Eur J Neurosci*  
892 29:171-180.
- 893 Davidson AJ, Yamazaki S, Arble DM, Menaker M, and Block GD (2008) Resetting of central and  
894 peripheral circadian oscillators in aged rats. *Neurobiol Aging* 29:471-477.
- 895 Destici E, Jacobs EH, Tamanini F, Loos M, van der Horst GTJ, Oklejewicz M (2013) Altered phase-  
896 relationship between peripheral oscillators and environmental time in *Cry1* or *Cry2* deficient mouse  
897 models for early and late chronotypes. *PLoS ONE* 8, e83802.
- 898 Evans JA and Davidson AJ (2013) Health consequences of circadian disruption in humans and animal  
899 models. *Prog Mol Biol Transl Sci* 119:283-323.
- 900 Evans JA, Leise TL, Castanon-Cervantes O, and Davidson AJ (2013) Dynamic interactions mediated by  
901 nonredundant signaling mechanisms couple circadian clock neurons. *Neuron* 80:973-983.
- 902 Evans JA, Leise TL, Castanon-Cervantes O, and Davidson AJ (2011) Intrinsic regulation of  
903 spatiotemporal organization within the suprachiasmatic nucleus. *PLoS One* 6:e15869.
- 904 Evans MS, Chaurette JP, Adams ST, Reddy GR, Paley MA, Aronin N, Prescher JA, and Miller SC (2014) A  
905 synthetic luciferin improves bioluminescence imaging in live mice. *Nat Methods* 11:393-395.

- 906 Fonjallaz P, Ossipow V, Wanner G, and Schibler U (1996) The two PAR leucine zipper proteins, TEF  
907 and DBP, display similar circadian and tissue-specific expression, but have different target promoter  
908 preferences. *EMBO J* 15:351-362.
- 909 Goyal V, DeVera C, Baba K, Sellers J, Chrenek MA, Iuvone PM, Tosini G (2021) Photoreceptor  
910 degeneration in homozygous male *Per2<sup>luc</sup>* mice during aging. *J Biol Rhythms* 36:137-145.
- 911 Hamada T, Sutherland K, Ishikawa M, Miyamoto N, Honma S, Shirato H, and Honma K (2016) *In vivo*  
912 imaging of clock gene expression in multiple tissues of freely moving mice. *Nat Commun* 7:11705.
- 913 Hara R, Wan K, Wakamatsu H, Aida R, Moriya T, Akiyama M, and Shibata S (2001) Restricted feeding  
914 entrains liver clock without participation of the suprachiasmatic nucleus. *Genes Cells* 6:269-278.
- 915 Harris JA, Hirokawa KE, Sorensen SA, Gu H, Mills M, Ng LL, Bohn P, Mortrud M, Ouellette B, Kidney  
916 J, Smith KA, Dang C, Sunkin S, Bernard A, Oh SW, Madisen L, and Zeng H (2014) Anatomical  
917 characterization of Cre driver mice for neural circuit mapping and manipulation. *Front Neural*  
918 *Circuits* 8:76.
- 919 Herzog ED hermanstynne T, Smyllie NJ, Hastings MH (2017) Regulating the suprachiasmatic nucleus  
920 (SCN) clockwork: Interplay between cell-autonomous and circuit-level mechanisms. *Cold Springs*  
921 *Harbor Perspect Biol* 9: a027706.
- 922 Hirota T, Lee JW, Lewis WG, Zhang EE, Breton G, Liu X, Garcia M, Peters EC, Etchegaray JP, Traver  
923 D, Schulz PG, Kay SA (2010) High-throughput chemical screen identified a novel potent modulator  
924 of cellular circadian rhythms and reveals CK1 alpha as a clock regulatory kinase. *PLoS Biol* 8,  
925 e1000559
- 926 Iwano S, Sugiyama M, Hama H, Watakabe A, Hasegawa N, Kuchimaru T, Tanaka KZ, Takahashi M, Ishida  
927 Y, Hata J, Shimozono S, Namiki K, Fukano T, Kiyama M, Okano H, Kizaka-Kondoh S, McHugh TJ,  
928 Yamamori T, Hioki H, Maki S, and Miyawaki A (2018) Single-cell bioluminescence imaging of deep  
929 tissue in freely moving animals. *Science* 359:935-939.
- 930 Joye DAM, Rohr KE, Keller D, Inda T, Telega A, Pancholi H, Carmona-Alcocer V, and Evans JA (2020)  
931 Reduced VIP expression affects circadian clock function in VIP-IRES-CRE Mice (JAX 010908). *J*  
932 *Biol Rhythms* 35:340-352.
- 933 Kim JH, Lee SR, Li LH, Park HJ, Park JH, Lee KY, Kim MK, Shin BA, Choi SY. (2011) High cleavage  
934 efficiency of a 2A peptide derived from porcine Teschovirus-1 in human cell lines, zebrafish and  
935 mice. *PLoS ONE* 6, e18556
- 936 Kondo T, Strayer CA, Kulkarni RD, Taylor W, Ishiura M, Golden SS, and Johnson CH (1993) Circadian  
937 rhythms in prokaryotes: luciferase as a reporter of circadian gene expression in cyanobacteria. *Proc*  
938 *Natl Acad Sci U S A* 90:5672-5676.
- 939 Kuhlman SJ, Quintero JE, McMahon DG (2000) GFP fluorescence reports *Period 1* circadian gene  
940 regulation in the mammalian biological clock. *NeuroReport* 11:1479-1482.
- 941 Kwon PK, Kim H-M, Kim SW, Kang B, Yi H, Ku H-O, Roh T-Y, Kim K-T (2019) The poly(C) motif in  
942 the proximal promoter region of D site-binding protein gene (*Dbp*) drives its high-amplitude  
943 oscillation. *Mol Cell Biol* 39:e00101-19
- 944 Kwon PK, Lee K-H, Kim J-h, Tae S, Ham S, Jeong Y-H, Kim SW, Kang B, Kim H-M, Choi J-H, Yi H,  
945 Ku H-O, Roh T-Y, Lim C, Kim K-T (2020) hnRNP K supports high-amplitude D site-binding protein  
946 mRNA (*Dbp* mRNA) oscillation to sustain circadian rhythms. *Mol Cell Biol* 40:e00537-19.

- 947  
948
- 949 Lee IT, Chang AS, Manandhar M, Shan Y, Fan J, Izumo M, Ikeda Y, Motoike T, Dixon S, Seinfeld JE,  
950 Takahashi JS, and Yanagisawa M (2015) Neuromedin S-producing neurons act as essential  
951 pacemakers in the suprachiasmatic nucleus to couple clock neurons and dictate circadian rhythms.  
952 *Neuron* 85:1086-1102.
- 953 Leise TL (2017) Analysis of nonstationary time series for biological rhythms research. *J Biol Rhythms*  
954 32:187-194.
- 955 Leise TL, Goldberg A, Michael J, Montoya G, Solow S, Molyneux P, Vetrivelan R, and Harrington ME  
956 (2020) Recurring circadian disruption alters circadian clock sensitivity to resetting. *Eur J Neurosci*  
957 51:2343-2354.
- 958 Leise TL and Harrington ME (2011) Wavelet-based time series analysis of circadian rhythms. *J Biol*  
959 *Rhythms* 26:454-463.
- 960 Leise TL, Harrington ME, Molyneux PC, Song I, Queenan H, Zimmerman E, Lall GS, and Biello SM  
961 (2013) Voluntary exercise can strengthen the circadian system in aged mice. *Age (Dordr)* 35:2137-  
962 2152.
- 963 Logan M, Martin JF, Nagy A, Lobe C, Olson EN, and Tabin CJ (2002) Expression of Cre recombinase in  
964 the developing mouse limb bud driven by a Prxl enhancer. *Genesis* 33:77-80.
- 965 Lopez-Molina L, Conquet F, Dubois-Dauphin M, and Schibler U (1997) The DBP gene is expressed  
966 according to a circadian rhythm in the suprachiasmatic nucleus and influences circadian behavior.  
967 *EMBO J* 16:6762-6771.
- 968 Martin-Burgos B, Wang W, William I, Tir S, Mohammad I, Javed R, Smith S, Cui Y, Smith CB, van  
969 der Vinne V, Molyneux PC, Miller SC, Weaver DR, Leise TL, Harrington ME (2020) Methods for  
970 detecting PER2::LUCIFERASE bioluminescence rhythms in freely moving mice. *BioRxiv*  
971 <https://doi.org/10.1038/s41467-017-00462-2>. *Journal of Biological Rhythms*, in press 2022.
- 972 Maywood ES, Drynan L, Chesham JE, Edwards MD, Dardente H, Fustin JM, Hazlerigg DG, O'Neill JS,  
973 Codner GF, Smyllie NJ, Brancaccio M, and Hastings MH (2013) Analysis of core circadian feedback  
974 loop in suprachiasmatic nucleus of *mCry1-luc* transgenic reporter mouse. *Proc Natl Acad Sci U S A*  
975 110:9547-9552.
- 976 Mei L, Fan Y, Lv X, Welsh DK, Zhan C, and Zhang EE (2018) Long-term in vivo recording of circadian  
977 rhythms in brains of freely moving mice. *Proc Natl Acad Sci U S A* 115:4276-4281.
- 978 Mieda M, Okamoto H, and Sakurai T (2016) Manipulating the cellular circadian period of arginine  
979 vasopressin neurons alters the behavioral circadian period. *Curr Biol* 26:2535-2542.
- 980 Mieda M, Ono D, Hasegawa E, Okamoto H, Honma K, Honma S, and Sakurai T (2015) Cellular clocks  
981 in AVP neurons of the SCN are critical for interneuronal coupling regulating circadian behavior  
982 rhythm. *Neuron* 85:1103-1116.
- 983 Millar AJ, Short SR, Chua NH, and Kay SA (1992) A novel circadian phenotype based on firefly  
984 luciferase expression in transgenic plants. *Plant Cell* 4:1075-1087.
- 985 Millar AJ, Carre IA, Strayer CA, Chua NH, Kay SA (1995). Circadian clock mutants in *Arabidopsis*  
986 identified by luciferase imaging. *Science* 267:1161-1163.

- 987 Miller JE, Granados-Fuentes D, Wang T, Marpegan L, Holy TE, and Herzog ED (2014) Vasoactive  
988 intestinal polypeptide mediates circadian rhythms in mammalian olfactory bulb and olfaction. *J*  
989 *Neurosci* 34:6040-6046.
- 990 Mohawk JA, Green CB, and Takahashi JS (2012) Central and peripheral circadian clocks in mammals.  
991 *Annu Rev Neurosci* 35:445-462.
- 992 Morgan LW, Greene AV, and Bell-Pedersen D (2003) Circadian and light-induced expression of  
993 luciferase in *Neurospora crassa*. *Fungal Genet Biol* 38:327-332.
- 994 Muñoz-Guzmán F, Caballero V, and Larrondo LF (2021) A global search for novel transcription factors  
995 impacting the *Neurospora crassa* circadian clock. *G3 (Bethesda)*. DOI: 10.1093/g3journal/jkab100
- 996 Nagano M, Adachi A, Nakahama K, Nakamura T, Tamada M, Meyer-Bernstein E, Sehgal A, and  
997 Shigeyoshi Y (2003) An abrupt shift in the day/night cycle causes desynchrony in the mammalian  
998 circadian center. *J Neurosci* 23:6141-6151.
- 999 Nagoshi E, Saini C, Bauer C, Laroche T, Naef F, and Schibler U (2004) Circadian gene expression in  
1000 individual fibroblasts: cell-autonomous and self-sustained oscillators pass time to daughter cells. *Cell*  
1001 119:693-705.
- 1002 Nakamura W, Yamazaki S, Takasu NN, Mishima K, and Block GD (2005) Differential response of  
1003 *Period 1* expression within the suprachiasmatic nucleus. *J Neurosci* 25:5481-5487.
- 1004 Nakamura W, Yamazaki S, Nakamura TJ, Shirakawa T, Block GD, and Takumi T (2008) *In vivo*  
1005 monitoring of circadian timing in freely moving mice. *Curr Biol* 18:381-385.
- 1006 Nicholls SK, Casiraghi LP, Wang W, Weber ET, and Harrington ME (2019) Evidence for internal  
1007 desynchrony caused by circadian clock resetting. *Yale J Biol Med* 92:259-270.
- 1008 Noguchi T, Harrison EM, Sun J, May D, Ng A, Welsh DK, and Gorman MR (2020) Circadian rhythm  
1009 bifurcation induces flexible phase resetting by reducing circadian amplitude. *Eur J Neurosci* 51:2329-  
1010 2342.
- 1011 Ono D, Honma K, and Honma S (2015a) Circadian and ultradian rhythms of clock gene expression in the  
1012 suprachiasmatic nucleus of freely moving mice. *Sci Rep* 5:12310.
- 1013 Patke A, Young MW, and Axelrod S (2020) Molecular mechanisms and physiological importance of  
1014 circadian rhythms. *Nat Rev Mol Cell Biol* 21:67-84.
- 1015 Pezuk P, Mohawk JA, Wang LA, and Menaker M (2012) Glucocorticoids as entraining signals for  
1016 peripheral circadian oscillators. *Endocrinology* 153:4775-4783.
- 1017 Postic C, Shiota M, Niswender KD, Jetton TL, Chen Y, Moates JM, Shelton KD, Lindner J, Cherrington  
1018 AD, and Magnuson MA (1999) Dual roles for glucokinase in glucose homeostasis as determined by  
1019 liver and pancreatic beta cell-specific gene knock-outs using Cre recombinase. *J Biol Chem* 274:305-  
1020 315.
- 1021 Poulsen RC, Warman GR, Sleight J, Ludin NM, and Cheeseman JF (2018) How does general anaesthesia  
1022 affect the circadian clock? *Sleep Med Rev* 37:35-44.
- 1023 Punia S, Rumery KK, Yu EA, Lambert CM, Notkins AL, and Weaver DR (2012) Disruption of gene  
1024 expression rhythms in mice lacking secretory vesicle proteins IA-2 and IA-2 $\beta$ . *Am J Physiol*  
1025 *Endocrinol Metab* 303:762.



- 1026 Ralph MR, Shi SQ, Johnson CH, Houdek P, Shrestha TC, Crosby P, O'Neill JS, Sladek M, Stinchcombe  
1027 AR, and Sumova A (2021) Targeted modification of the *Per2* clock gene alters circadian function in  
1028 *mPer2<sup>luciferase</sup> (mPer2<sup>Luc</sup>)* mice. *PLoS Comput Biol* 17:e1008987.
- 1029 Reddy AB, Field MD, Maywood ES, and Hastings MH (2002) Differential resynchronization of circadian  
1030 clock gene expression within the suprachiasmatic nuclei of mice subjected to experimental jet lag. *J*  
1031 *Neurosci* 22:7326-7330.
- 1032 Ripperger JA and Schibler U (2006) Rhythmic CLOCK-BMAL1 binding to multiple E-box motifs drives  
1033 circadian Dbp transcription and chromatin transitions. *Nat Genet* 38:369-374.
- 1034 Ripperger JA, Shearman LP, Reppert SM, Schibler U (2000) CLOCK, an essential pacemaker  
1035 component, controls expression of the circadian transcription factor DBP. *Genes Dev* 14:679-689.
- 1036 Roenneberg T and Merrow M (2016) The Circadian Clock and Human Health. *Curr Biol* 26:432.
- 1037 Saini C, Liani A, Curie T, Gos P, Kreppel F, Emmenegger Y, Bonacina L, Wolf JP, Poget YA, Franken  
1038 P, and Schibler U (2013) Real-time recording of circadian liver gene expression in freely moving  
1039 mice reveals the phase-setting behavior of hepatocyte clocks. *Genes Dev* 27:1526-1536.
- 1040 Sawai Y, Okamoto T, Muranaka Y, Nakamura R, Matsumura R, Node K, and Akashi M (2019) *In vivo*  
1041 evaluation of the effect of lithium on peripheral circadian clocks by real-time monitoring of clock gene  
1042 expression in near-freely moving mice. *Sci Rep* 9:10909-3.
- 1043 Sellix MT, Evans JA, Leise TL, Castanon-Cervantes O, Hill DD, DeLisser P, Block GD, Menaker M, and  
1044 Davidson AJ (2012) Aging differentially affects the re-entrainment response of central and peripheral  
1045 circadian oscillators. *J Neurosci* 32:16193-16202.
- 1046 Shan Y, Abel JH, Li Y, Izumo M, Cox KH, Jeong B, Yoo SH, Olson DP, Doyle FJ, and Takahashi JS  
1047 (2020) Dual-color single-cell imaging of the Suprachiasmatic Nucleus reveals a circadian role in  
1048 network synchrony. *Neuron* 108:164-179.e7
- 1049 Shao X; Somlo S; Igarashi P (2002) Epithelial-specific Cre/lox recombination in the developing kidney  
1050 and genitourinary tract. *J Am Soc Nephrol* 13: 1837-1846.
- 1051 Sinturel F, Gos P, Petrenko V, Hagedorn C, Kreppel F, Storch KF, Knutti D, Liani A, Weitz C,  
1052 Emmenegger Y, Franken P, Bonacina L, Dibner C, and Schibler U (2021) Circadian hepatocyte  
1053 clocks keep synchrony in the absence of a master pacemaker in the suprachiasmatic nucleus or other  
1054 extrahepatic clocks. *Genes Dev* 35:329-334.
- 1055 Smyllie NJ, Pilorz V, Boyd J, Meng QJ, Saer B, Chesham JE, Maywood ES, Krogager TP, Spiller DG,  
1056 Boot-Handford R, White MR, Hastings MH, Loudon AS (2016) Visualizing and quantifying  
1057 intracellular behavior and abundance of the core circadian clock protein PERIOD2. *Curr Biol*  
1058 26:1880-1886.
- 1059 Stanewsky R, Kaneko M, Emery P, Beretta B, Wager-Smith K, Kay SA, Rosbash M, and Hall JC (1998)  
1060 The *cry<sup>b</sup>* mutation identifies cryptochrome as a circadian photoreceptor in *Drosophila*. *Cell* 95:681-  
1061 692.
- 1063 Stokkan KA, Yamazaki S, Tei H, Sakaki Y, and Menaker M (2001) Entrainment of the circadian clock in  
1064 the liver by feeding. *Science* 291:490-493.

- 1065 Stratmann M, Suter DM, Molina N, Naef F, and Schibler U (2012) Circadian *Dbp* transcription relies on  
1066 highly dynamic BMAL1-CLOCK interaction with E boxes and requires the proteasome. *Mol Cell*  
1067 48:277-287.
- 1068 Tahara Y, Kuroda H, Saito K, Nakajima Y, Kubo Y, Ohnishi N, Seo Y, Otsuka M, Fuse Y, Ohura Y,  
1069 Komatsu T, Moriya Y, Okada S, Furutani N, Hirao A, Horikawa K, Kudo T, and Shibata S (2012) *In*  
1070 *vivo* monitoring of peripheral circadian clocks in the mouse. *Curr Biol* 22:1029-1034.
- 1071 Tam SKE, Brown LA, Wilson TS, Tir S, Fisk AS, Potheary CA, van der Vinne V, Foster RG,  
1072 Vyazovskiy VV, Bannerman DM, Harrington ME, Peirson SN (2021) Dim light in the evening  
1073 causes coordinated realignment of circadian rhythms, sleep, and short-term memory. *Proc Natl Acad*  
1074 *Sci* 118:e2101591118. doi: 10.1073/pnas.2101591118.
- 1075 van der Vinne V, Martin Burgos B, Harrington ME, and Weaver DR (2020) Deconstructing circadian  
1076 disruption: Assessing the contribution of reduced peripheral oscillator amplitude on obesity and  
1077 glucose intolerance in mice. *J Pineal Res* 69:e12654.
- 1078 van der Vinne V, Swoap SJ, Vajtay TJ, and Weaver DR (2018) Desynchrony between brain and  
1079 peripheral clocks caused by CK1 $\delta/\epsilon$  disruption in GABA neurons does not lead to adverse metabolic  
1080 outcomes. *Proc Natl Acad Sci U S A* 115:E2437-E2446.
- 1081 Weaver DR, van der Vinne V, Giannaris EL, Vajtay TJ, Holloway KL, and Anaclet C (2018)  
1082 Functionally complete excision of conditional alleles in the mouse suprachiasmatic nucleus by *Vgat-*  
1083 *IRE5-Cre*. *J Biol Rhythms* 33:179-191.
- 1084 Weger M, Weger BD, Diotel N, Rastegar S, Hirota T, Kay SA, Strahle U, and Dickmeis T (2013) Real-  
1085 time *in vivo* monitoring of circadian E-box enhancer activity: a robust and sensitive zebrafish reporter  
1086 line for developmental, chemical and neural biology of the circadian clock. *Dev Biol* 380:259-273.
- 1087 Welsh DK, Yoo SH, Liu AC, Takahashi JS, Kay SA (2004) Bioluminescence imaging of individual  
1088 fibroblasts reveals persistent, independently phased circadian rhythms of clock gene expression. *Curr*  
1089 *Biol* 14:2289-2295.
- 1090 West AC and Bechtold DA (2015) The cost of circadian desynchrony: Evidence, insights and open  
1091 questions. *Bioessays* 37:777-788.
- 1092 Xie X, Kukino A, Calcagno HE, Berman AM, Garner JP, and Butler MP (2020) Natural food intake  
1093 patterns have little synchronizing effect on peripheral circadian clocks. *BMC Biol* 18:160-7.
- 1094 Yagita K, Okamura H (2000) Forskolin induces circadian gene expression of rPer1, rPer2 and dbp in  
1095 mammalian rat-1 fibroblasts. *FEBS Lett* 465:79-82.
- 1096 Yamaguchi S, Kobayashi M, Mitsui S, Ishida Y, van der Horst, G. T., Suzuki M, Shibata S, and Okamura  
1097 H (2001) View of a mouse clock gene ticking. *Nature* 409:684.
- 1098 Yamaguchi Y, Suzuki T, Mizoro Y, Kori H, Okada K, Chen Y, Fustin JM, Yamazaki F, Mizuguchi N,  
1099 Zhang J, Dong X, Tsujimoto G, Okuno Y, Doi M, and Okamura H (2013) Mice genetically deficient  
1100 in vasopressin V1a and V1b receptors are resistant to jet lag. *Science* 342:85-90.
- 1101 Yamaguchi Y, Okada K, Mizuno T, Ota T, Yamada H, Doi M, Kobayashi M, Tei H, Shigeyoshi Y,  
1102 Okamura H (2016). Real-time recording of circadian *Per1* and *Per2* expression in the  
1103 suprachiasmatic nucleus of freely moving rats. *J Biol Rhythms* 31:108-111.



- 1104 Yamanaka Y, Honma S, and Honma K (2008) Scheduled exposures to a novel environment with a  
1105 running-wheel differentially accelerate re-entrainment of mice peripheral clocks to new light-dark  
1106 cycles. *Genes Cells* 13:497-507.
- 1107 Yamazaki S and Takahashi JS (2005) Real-time luminescence reporting of circadian gene expression in  
1108 mammals. *Methods Enzymol* 393:288-301.
- 1109 Yamazaki S, Numano R, Abe M, Hida A, Takahashi R, Ueda M, Block GD, Sakaki Y, Menaker M, and  
1110 Tei H (2000) Resetting central and peripheral circadian oscillators in transgenic rats. *Science*  
1111 288:682-685.
- 1112 Yan L, Miyake S, Okamura H (2000) Distribution and circadian expression of *dbp* in SCN and extra-SCN  
1113 areas in the mouse brain. *J Neurosci Res* 59:291-295.
- 1114 Yang N, Smyllie NJ, Morris H, Gonçalves CF, Dudek M, Pathirana DRJ, Chesham JE, Adamson A,  
1115 Spiller DG, Zindy E, Bagnall J, Humphreys N, Hoyland J, Loudon ASI, Hastings MH, Meng QJ  
1116 (2020) Quantitative live imaging of Venus::BMAL1 in a mouse model reveals complex dynamics of  
1117 the master circadian clock regulator. *PLoS Genet* 16: e1008729. doi: 10.1371/journal.pgen.1008729.
- 1118 Yoo SH, Ko CH, Lowrey PL, Buhr ED, Song EJ, Chang S, Yoo OJ, Yamazaki S, Lee C, and Takahashi  
1119 JS (2005) A noncanonical E-box enhancer drives mouse *Period2* circadian oscillations *in vivo*. *Proc*  
1120 *Natl Acad Sci U S A* 102:2608-2613.
- 1121 Yoo SH, Yamazaki S, Lowrey PL, Shimomura K, Ko CH, Buhr ED, Siepen SM, Hong HK, Oh WJ, Yoo  
1122 OJ, Menaker M, and Takahashi JS (2004) PERIOD2::LUCIFERASE real-time reporting of circadian  
1123 dynamics reveals persistent circadian oscillations in mouse peripheral tissues. *Proc Natl Acad Sci U S*  
1124 *A* 101:5339-5346.
- 1125 Yoo SH, Kojima S, Shimomura K, Koike N, Buhr ED, Furukawa T, Ko CH, Glostom G, Ayoub C,  
1126 Nohara K, Reyes BA, Tsuchiya Y, Yoo OJ, Yagita K, Lee C, Chen Z, Yamazaki S, Green CB, and  
1127 Takahashi JS (2017) *Period2* 3'-UTR and microRNA-24 regulate circadian rhythms by repressing  
1128 PERIOD2 protein accumulation. *Proc Natl Acad Sci U S A* 114:E8855-E8864.
- 1129 Zhang EE, Liu AC, Hirota T, miraglia LJ, Welch G, Pongsawakul PY, liu X, Atwood A, Huss JW 3<sup>rd</sup>,  
1130 Janes J, Su AI, Hogenesch JB, Kay SA (2009) A genome-wide RNAi screen for modulators of the  
1131 circadian clock in human cells *Cell* 139: 199-210.
- 1132 Zhang R, Lahens NF, Ballance HI, Hughes ME, and Hogenesch JB (2014) A circadian gene expression  
1133 atlas in mammals: implications for biology and medicine. *Proc Natl Acad Sci U S A* 111:16219-  
1134 16224.

1135 **Figures and Tables**

1136

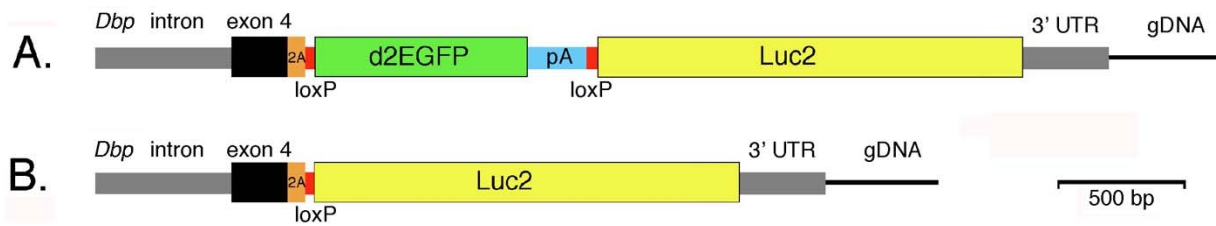

1137

1138 **Figure 1. Generation of a bifunctional reporter from the mouse *Dbp* locus.**

1139 **A.** The mouse *Dbp* locus was modified by CRISPR-mediated insertion of the donor construct shown. The  
1140 construct contained homology arms from the *Dbp* locus (gray and black) and inserted the reporter  
1141 sequences with a T2A-encoding sequence (orange) between DBP and the reporter. Destabilized EGFP  
1142 (d2EGFP) with a bovine growth hormone polyadenylation site (PA) was flanked by *loxP* sites (red).  
1143 Downstream of *GFP* is a luciferase (*Luc2*) reporter gene. Without recombination *Dbp* and *GFP* are  
1144 expressed as a single transcript from the conditional (*Dbp<sup>KI</sup>* allele).

1145 **B.** With *Cre*-mediated recombination, GFP-encoding sequences are excised and *Dbp* and *luciferase* are  
1146 expressed as a single transcript. The T2A sequence generates separate proteins from these bifunctional  
1147 transcripts. *Cre*-mediated germline recombination led to mice expressing luciferase non-conditionally  
1148 from the *Dbp<sup>Luc</sup>* allele.

1149

1150

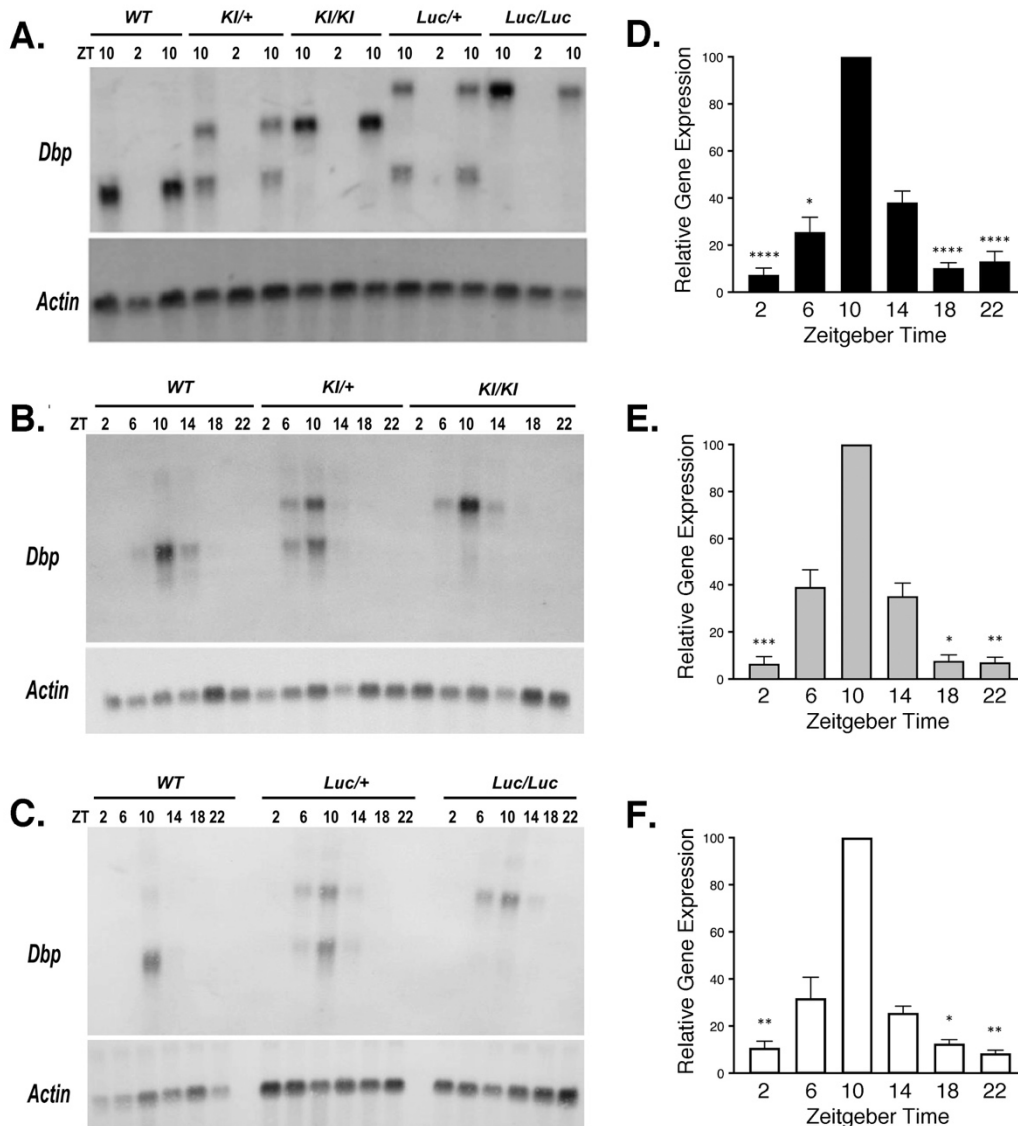

1151

1152 **Figure 2. *Dbp* mRNA rhythms are not altered in reporter mice.**

1153 **A-C.** Representative Northern Blots probed to detect *Dbp* and *Actin* mRNA. **A.** From each of five  
 1154 genotypes, RNA samples were extracted from livers collected at ZT 2 and 10. For each genotype, there  
 1155 are two samples at ZT10 and one sample at ZT2 on this blot. **B.** and **C.** Representative Northern Blots of  
 1156 RNA samples collected from WT and reporter mouse livers at each of six Zeitgeber times (ZT).

1157 **D-F.** Quantification of *Dbp* mRNA rhythms for each allele in time-series experiments (6 time-points  
 1158 each). Results are expressed as mean ( $\pm$  SEM) percent of the peak *Dbp/Actin* ratio, which occurred at ZT  
 1159 10 on every blot. **D.** Wild-type *Dbp* transcript (n=12 sample sets). **E.** *Dbp<sup>KI</sup>* transcript (n= 6). **F.** *Dbp<sup>Luc</sup>*  
 1160 transcript (n= 6). For each transcript, there was a significant rhythm (Friedman's One-way ANOVA,  $Q >$   
 1161 19,  $p < 0.002$ ). Asterisks indicate time-points that differed significantly from ZT10 (Dunn's test,  $* p <$

1162 0.05, \*\*  $p < 0.01$ , \*\*\*  $p < 0.001$ , \*\*\*\*  $p \leq 0.0001$ ). Significant differences among some other time-points  
1163 are not shown for clarity.  
1164

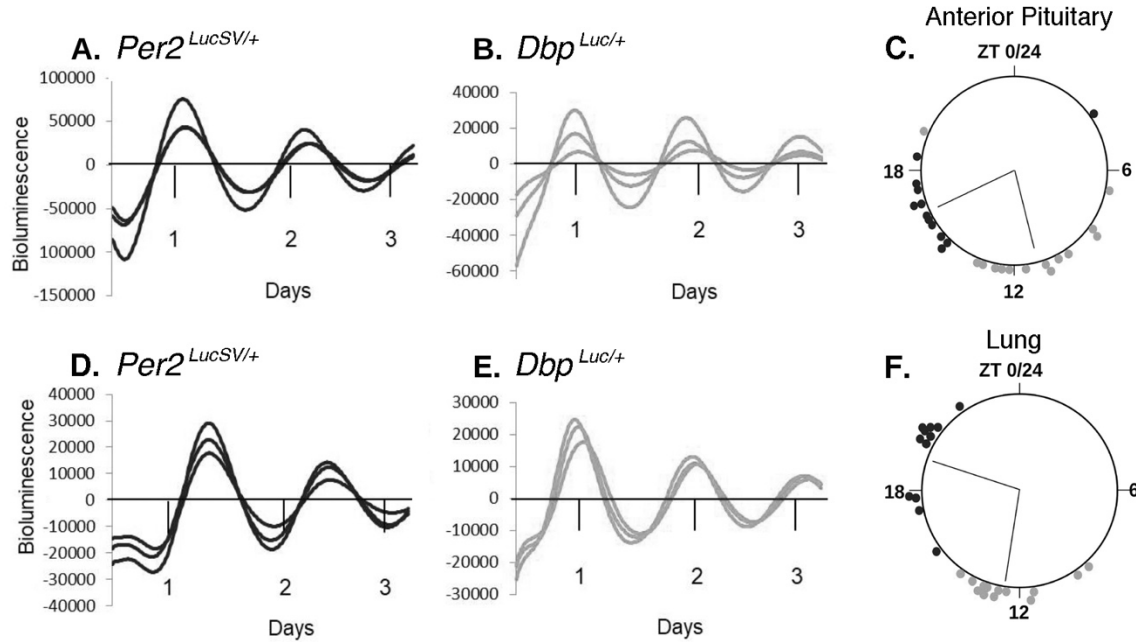

1165

1166

1167 **Figure 3. Ex vivo bioluminescence rhythms from *Per2*<sup>LucSV/+</sup> and *Dbp*<sup>Luc/+</sup> tissue explants.**

1168 **A-C.**, Anterior Pituitary gland. **D-F.**, Lung.

1169 **A., B., D., and E.** are representative bioluminescence rhythms from triplicate tissue explants from  
1170 *Per2*<sup>LucSV/+</sup> (**A., D.**) and *Dbp*<sup>Luc/+</sup> mice (**B., E.**). ‘Days’ refers to time in culture, not projected ZT. Values  
1171 are 24-h background-subtracted and 3-h smoothed.

1172 **C., F.**, Time of peak bioluminescence *ex vivo*. The large circles represent a 24-h day for each organ. ZT’s  
1173 refer to the lighting cycle to which the mice were exposed prior to sample collection, with ZT0-12 being  
1174 the light phase. Circles at the perimeter of the large circle indicate the timing of peak bioluminescence of  
1175 individual *Per2*<sup>LucSV/+</sup> (black) or *Dbp*<sup>Luc/+</sup> (gray) tissue explants (n=12-14 mice). Within each  
1176 tissue/genotype combination, there was significant clustering of times of peak bioluminescence. Radial  
1177 lines represent the mean peak time, which differed significantly between genotypes for each tissue  
1178 (Watson-Williams test, p<0.001).

1179

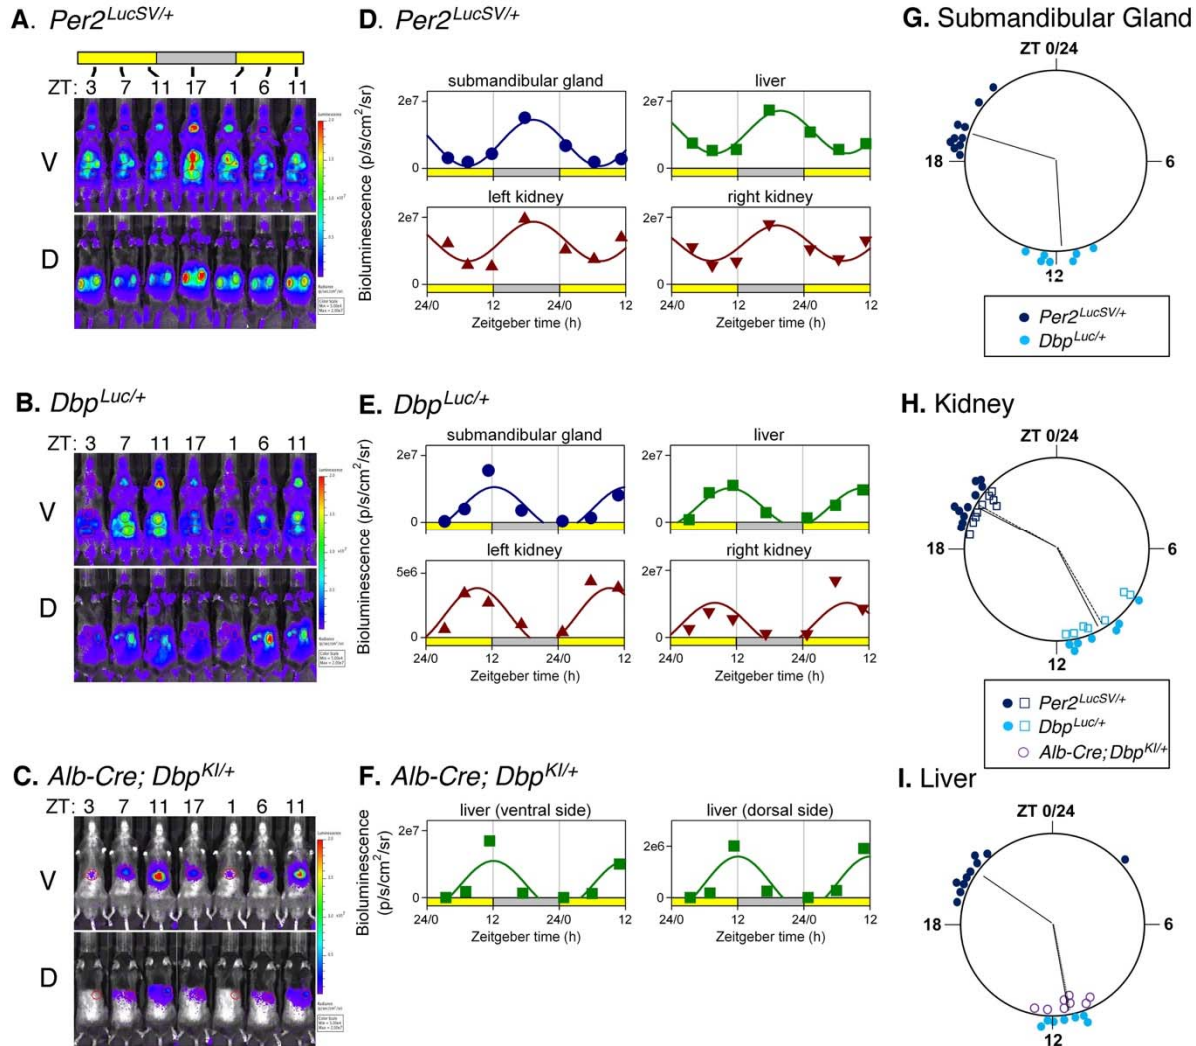

1180

1181 **Figure 4. Bioluminescence rhythms measured *in vivo*.**

1182 **A-C.** Bioluminescence images captured at 4-6 hr intervals from a representative mouse of each genotype.

1183 **A.**  $Per2^{LucSV/+}$ , **B.**  $Dbp^{Luc/+}$  **C.**  $Alb-Cre+ ; Dbp^{KI/+}$ . Ventral (V) and dorsal (D) views are shown for each

1184 mouse. All images for each mouse are set to the same luminescence scale.

1185 **D-F.** Cosinor-fitting of bioluminescence signal over time for the animals shown in Panels A-C to

1186 determine peak time. Bioluminescence rhythms were assessed in submandibular gland, liver, and kidneys

1187 of **(D.)**  $Per2^{LucSV/+}$  and **(E.)**  $Dbp^{Luc/+}$  reporter mice, and from liver of  $Alb-Cre+ ; Dbp^{KI/+}$  mice **(F.)**.

1188 **G-I.** Time of peak bioluminescence *in vivo*. **G.** Submandibular gland, **H.** Kidneys, and **I.** Liver. Data

1189 plotted as in Fig. 3.  $Per2^{LucSV/+}$  tissues (n=10, dark blue),  $Dbp^{Luc/+}$  tissues (n=7, teal). In Panel H, open

1190 squares and filled circles represent the right and left kidneys, respectively. In Panel I, purple circles

1191 represent livers from  $Alb-Cre+ ; Dbp^{KI/+}$  mice (n=8). Radial lines represent the mean peak time for each

1192 genotype and tissue. Radial lines from the two kidneys of a genotype are nearly overlapping. For liver,

1193 radial lines for the two *Dbp* reporter lines are overlapping and appear as a single line. Within each organ  
1194 examined, time of peak differed significantly in *Per2<sup>LucSV/+</sup>* explants compared to *Dbp<sup>Luc/+</sup>* and *Alb-Cre+* ;  
1195 *Dbp<sup>KI/+</sup>* explants ( $p=0.002$ , Watson-Williams test). There was no significant difference in peak time  
1196 between *Dbp<sup>Luc/+</sup>* and *Alb-Cre+* ; *Dbp<sup>KI/+</sup>* liver tissues ( $p>0.05$ ).

1197

1198



1199

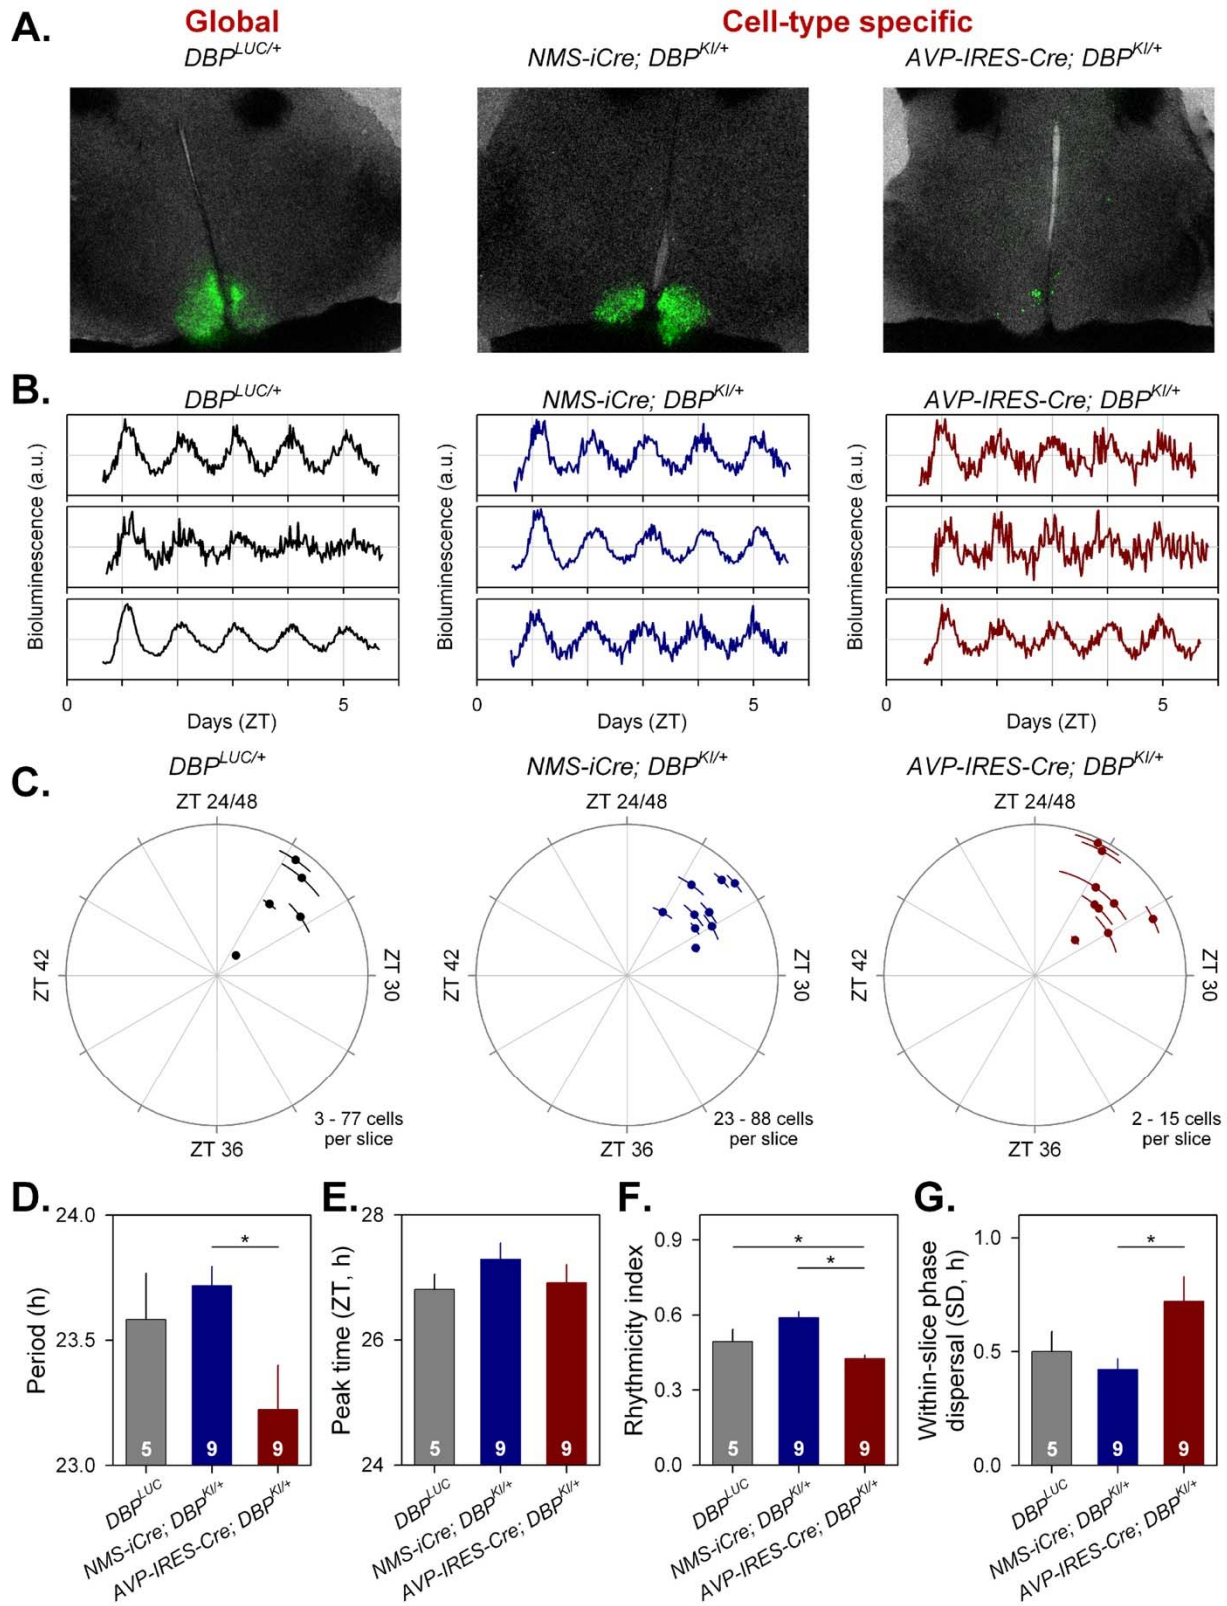

1200

1201

**Figure 5. Cell-type-specific imaging of luciferase expression in SCN slices.**

1202

1203 **A)** 24h summed bioluminescence overlaid onto bright field images of a section through the SCN from  
1204 *Dbp<sup>Luc/+</sup>* (global reporter expression, left), and in mice expressing luciferase from specific subsets of SCN  
1205 neurons (NMS<sup>+</sup> cells, center; AVP<sup>+</sup> cells, right).

1206 **B.** Representative bioluminescence traces from single neuron-like ROIs in slices from each genotype.

1207 **C.** Circular plots indicate the peak time of bioluminescence rhythms from each genotype. Time is  
1208 expressed relative to the light-dark cycle the mice were housed in prior to sacrifice; numbers >24 are used  
1209 to indicate that these measures are recorded on the first day in culture and are plotted relative to the  
1210 previous lighting conditions. Each slice is represented by a small dot. Placement of the dot relative to  
1211 outer circle indicates average peak time ( $\pm$ SD), while the distance from the center corresponds to the  
1212 number of cells incorporated in the average ( $\sqrt{\text{cell\#}}$ ).

1213 **D-G.** Rhythm parameters by genotype. The number of slices per genotype is indicated at the base of each  
1214 bar.

1215 **D.** Mean period ( $\pm$  SEM).

1216 **E.** Circular mean peak time ( $\pm$  SEM).

1217 **F.** Mean rhythmicity index score ( $\pm$  SEM).

1218 **G.** Mean peak time dispersal (quantified by circular SD of peak times within each slice).

1219

1220

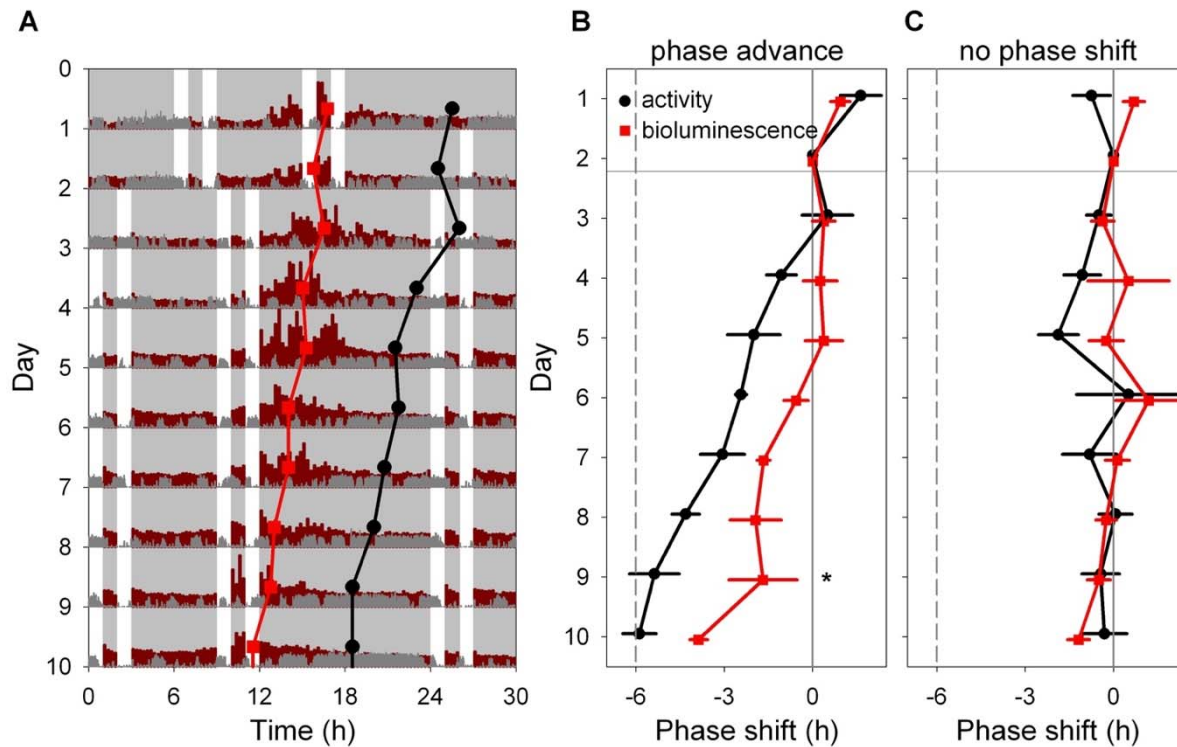

1221

1222 **Figure 6. Light-induced resetting produces misalignment between rhythms in liver**  
1223 **bioluminescence and locomotor activity.**

1224 **A.** Representative double-plotted actogram showing locomotor activity (dark gray) and bioluminescence  
1225 (dark red) of an *Alb-Cre; Dbp<sup>KI/+</sup>* liver reporter mouse before and after a 6-h advance of the skeleton  
1226 photoperiod consisting of four 1-h periods of light per 24-h day, as indicated by white. The skeleton  
1227 photoperiod was advanced by 6 h by shortening the dark phase after the last light pulse on Day 2. Red  
1228 squares represent the peak of the bioluminescence rhythm, while black circles represent the midpoint of  
1229 locomotor activity each day, determined by discrete wavelet transform analysis. Six hours of each cycle  
1230 are double-plotted to aid visualization. Light and dark are indicated by white and gray backgrounds,  
1231 respectively.

1232 **B.** Mean ( $\pm$  SEM) midpoint of locomotor activity (black) and peak of liver bioluminescence (red) rhythms  
1233 are shown, relative to their initial value, in a group of 4 mice exposed to a 6-h phase advance of the  
1234 skeleton photoperiod. The locomotor activity rhythm re-sets more rapidly than the bioluminescence  
1235 rhythm within animal (Significant Measure \* Day interaction, and significant phase difference between  
1236 the rhythms on Day 9; Tukey HSD,  $p < 0.05$ ).

1237 **C.** Mean ( $\pm$  SEM) time of midpoint of locomotor activity (black) and peak liver bioluminescence (red)  
1238 rhythms are shown, relative to their initial phase, in a group of 4 mice not subjected to a phase shift of the  
1239 skeleton photoperiod.

1240

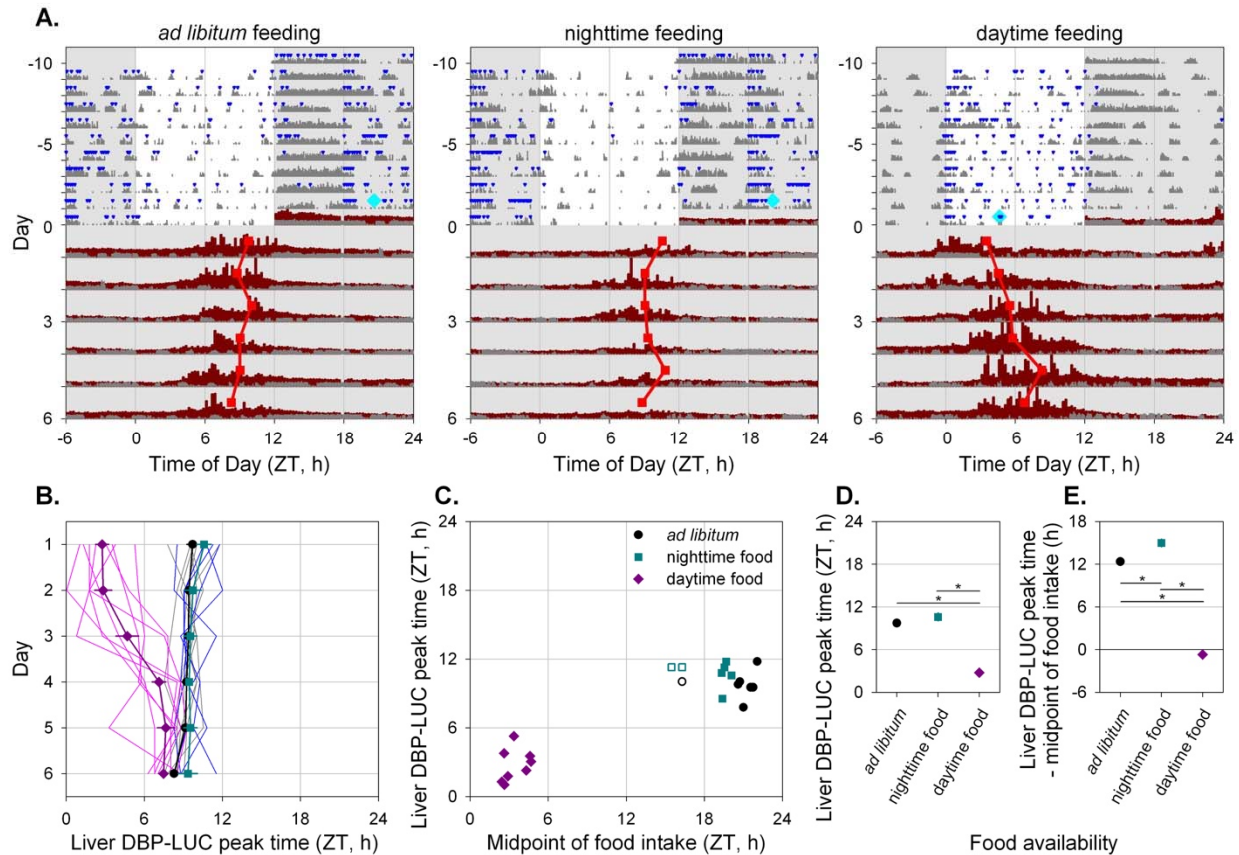

1241

1242 **Figure 7. Time-restricted feeding alters the timing of liver bioluminescence rhythms.**

1243 **A.** Representative actograms of three *Alb-Cre; Dbp<sup>KI/+</sup>* liver reporter mice exposed to the different  
1244 feeding regimes as indicated above each panel. Mice were housed in 12L:12D lighting and exposed  
1245 to the specified feeding regime for ten days (-10 to 0) before bioluminescence recording. Food  
1246 intake (blue triangles) and general locomotor activity (dark gray) were recorded continuously. The  
1247 midpoint of food intake from days -5 to 0 is indicated by a cyan diamond on day 0. Mice were  
1248 transferred to the bioluminescence recording setup at the start of the dark phase and housed in  
1249 constant darkness with *ad libitum* food access. Liver bioluminescence levels are depicted in dark  
1250 red. Red squares represent the time of peak of the bioluminescence rhythm, determined by DWT.  
1251 Six hours of each cycle are double-plotted and the y-axis has been stretched during the last 6 days  
1252 to aid visualization. Light and dark are indicated by white and gray backgrounds, respectively.

1253 **B.** Individual and mean ( $\pm$  SEM) phase of liver bioluminescence rhythms relative to clock time for  
1254 three feeding groups. Mice previously exposed to *ad libitum*, nighttime and daytime feeding are  
1255 plotted in grey/black, blue/cyan and magenta, respectively (key in Panel C). Prior to recording  
1256 bioluminescence, mice were entrained to a 12L:12D lighting cycle with lights on at 0600. Mice

- 1257 previously exposed to daytime feeding show an advanced peak phase of liver bioluminescence that  
1258 reverts over time in constant darkness with *ad libitum* food.
- 1259 **C.** Relationship between preceding feeding phase and peak liver bioluminescence phase for individual  
1260 animals on the first day under constant conditions. *Ad libitum* and night-fed groups had similar  
1261 midpoint of food intake; three “outliers” with respect to midpoint of food intake (shown by open  
1262 symbols) were not included in further analyses (Panels B, D and E).
- 1263 **D.** Mean ( $\pm$  SEM) peak liver bioluminescence phase on the first day under constant conditions, relative  
1264 to clock time for the three feeding regimens. Error bars were nearly or completely contained within  
1265 the symbols.
- 1266 **E.** Mean ( $\pm$ SEM) peak liver bioluminescence phase on the first day under constant conditions, relative  
1267 to the midpoint of preceding food intake for the three feeding regimens. Error bars were nearly or  
1268 completely contained within the symbols.
- 1269

1270 **Table 1:** Period length of locomotor activity rhythms in constant darkness, by sex and genotype

1271

| 1272 | <u>Genotype</u>               | <u>Sex</u> | <u>N</u> | <u>tau<sub>DD</sub> (Mean +/- SEM), h</u> |
|------|-------------------------------|------------|----------|-------------------------------------------|
| 1273 | <i>Dbp</i> <sup>+/+</sup>     | Male       | 15       | 23.88 ± 0.027                             |
| 1274 | <i>Dbp</i> <sup>KI/+</sup>    | Male       | 10       | 23.91 ± 0.057                             |
| 1275 | <i>Dbp</i> <sup>KI/KI</sup>   | Male       | 11       | 23.92 ± 0.036                             |
| 1276 | <i>Dbp</i> <sup>Luc/+</sup>   | Male       | 11       | 23.86 ± 0.025                             |
| 1277 | <i>Dbp</i> <sup>Luc/Luc</sup> | Male       | 8        | 23.97 ± 0.029                             |
| 1278 |                               |            |          |                                           |
| 1279 | <i>Dbp</i> <sup>+/+</sup>     | Female     | 21       | 23.87 ± 0.021                             |
| 1280 | <i>Dbp</i> <sup>KI/+</sup>    | Female     | 9        | 23.89 ± 0.036                             |
| 1281 | <i>Dbp</i> <sup>KI/KI</sup>   | Female     | 11       | 23.79 ± 0.030                             |
| 1282 | <i>Dbp</i> <sup>Luc/+</sup>   | Female     | 8        | 23.82 ± 0.053                             |
| 1283 | <i>Dbp</i> <sup>Luc/Luc</sup> | Female     | 8        | 23.75 ± 0.042                             |
